# Supplementary material for: Symmetry of octa-coordination environment has a substantial influence on dinuclear TbIII triple-decker single-molecule magnets
Source: Royal Society of Chemistry journal article supplement (doi:10.1039/c5sc04669f), 2016-01-01
Supplement: c5sc04669f1.pdf [file c5sc04669f1.pdf]

## Supporting Information for

# Symmetry of Octacoordination Environment has a Substantial Influence on Dinuclear Tb<sup>III</sup> Triple-Decker Single-Molecule Magnets

Keiichi Katoh,<sup>a,b\*</sup> Brian K. Breedlove<sup>a,b</sup> and Masahiro Yamashita<sup>a,b\*</sup>

<sup>a</sup> Department of Chemistry, Graduate School of Science, Tohoku University, 6-3 Aramaki Aza Aoba, Aoba-ku, Sendai, Miyagi 980-8578, Japan.

<sup>b</sup> CREST, JST, 4-1-8 Honcho, Kawaguchi, Saitama 332-0012, Japan.

### CONTACT AUTHOR

Phone; +81-22-795-3878. Fax: +81-22-795-3878.

E-mail: kkatoh@m.tohoku.ac.jp (KK)

## Table of Contents

- 1 Spectroscopic data for **1**: **Fig. S1** and **S2**.
- 2 PXRD patterns of **1** and **2**: **Fig. S3-1** and **S3-2**.
- 3 Schematic illustration of the coordination site in the double-decker Ln<sup>III</sup>-Pc complexes: **Fig. S4**.
- 4 Packing diagram of **1**: **Fig. S5**.
- 5 Packing diagram of **2**: **Figs. S6-1** and **S6-2**.
- 6 Temperature dependence of  $1/\chi_M$  for powder samples of **1** and **2** at 500 Oe: **Fig. S7**.
- 7 The field dependence of the magnetization ( $M-HT^{-1}$  and  $M-H$ ) of **1–3**: **Fig. S8**.
- 8 Temperature dependence of  $\chi_M T$  and  $M-H$  for solution samples of **1** and **2** at 1000 Oe: **Figs. S9-1** and **S9-2**.
- 9 Ac measurements on **1** and **2** in several dc magnetic fields ( $H_{dc} = \text{zero–6000 Oe}$ ): **Figs. S10–S20, S22–S23, S25–S27, and S28**.
- 10 Arrhenius plots made by using parameters obtained from  $\chi_M''$  versus  $\nu$  plots for **1**: **Figs. S21** and **S24**.
- 11 Schematic representation of electronic structure of Tb<sup>III</sup> ion ( $4f^8$ ) and TbPc<sub>2</sub> complexes: **Fig. S29**.
- 12 SMM properties of **3** (molecular structure, a dual magnetic relaxation process, micro-SQUID, and Zeeman diagrams of the doublet ground-state): **Fig. S30**.
- 13 Selected crystallographic data for **1–3**: **Table S1**.
- 14 Selected values  $\Delta$  and  $\tau_0$  of **1** and **2** by Kramers-Kronig equation: **Table S2** and **S3**.
- 15  $\tau$  values at 5 K for **1–3** in a several  $H_{dc}$ : **Table S4**.
- 16 Selected the geometry and SMM parameters of **1–3** and related SMM: **Table S5**.
- 17 Kramers-Kronig equation: **eq. S1–S3**.
- 18 Generalized Debye model: **eq. S4–S6**.
- 19 Arrhenius equation: **eq. S7**.
- 20 Extended Debye model: **eq. S8–S10**.

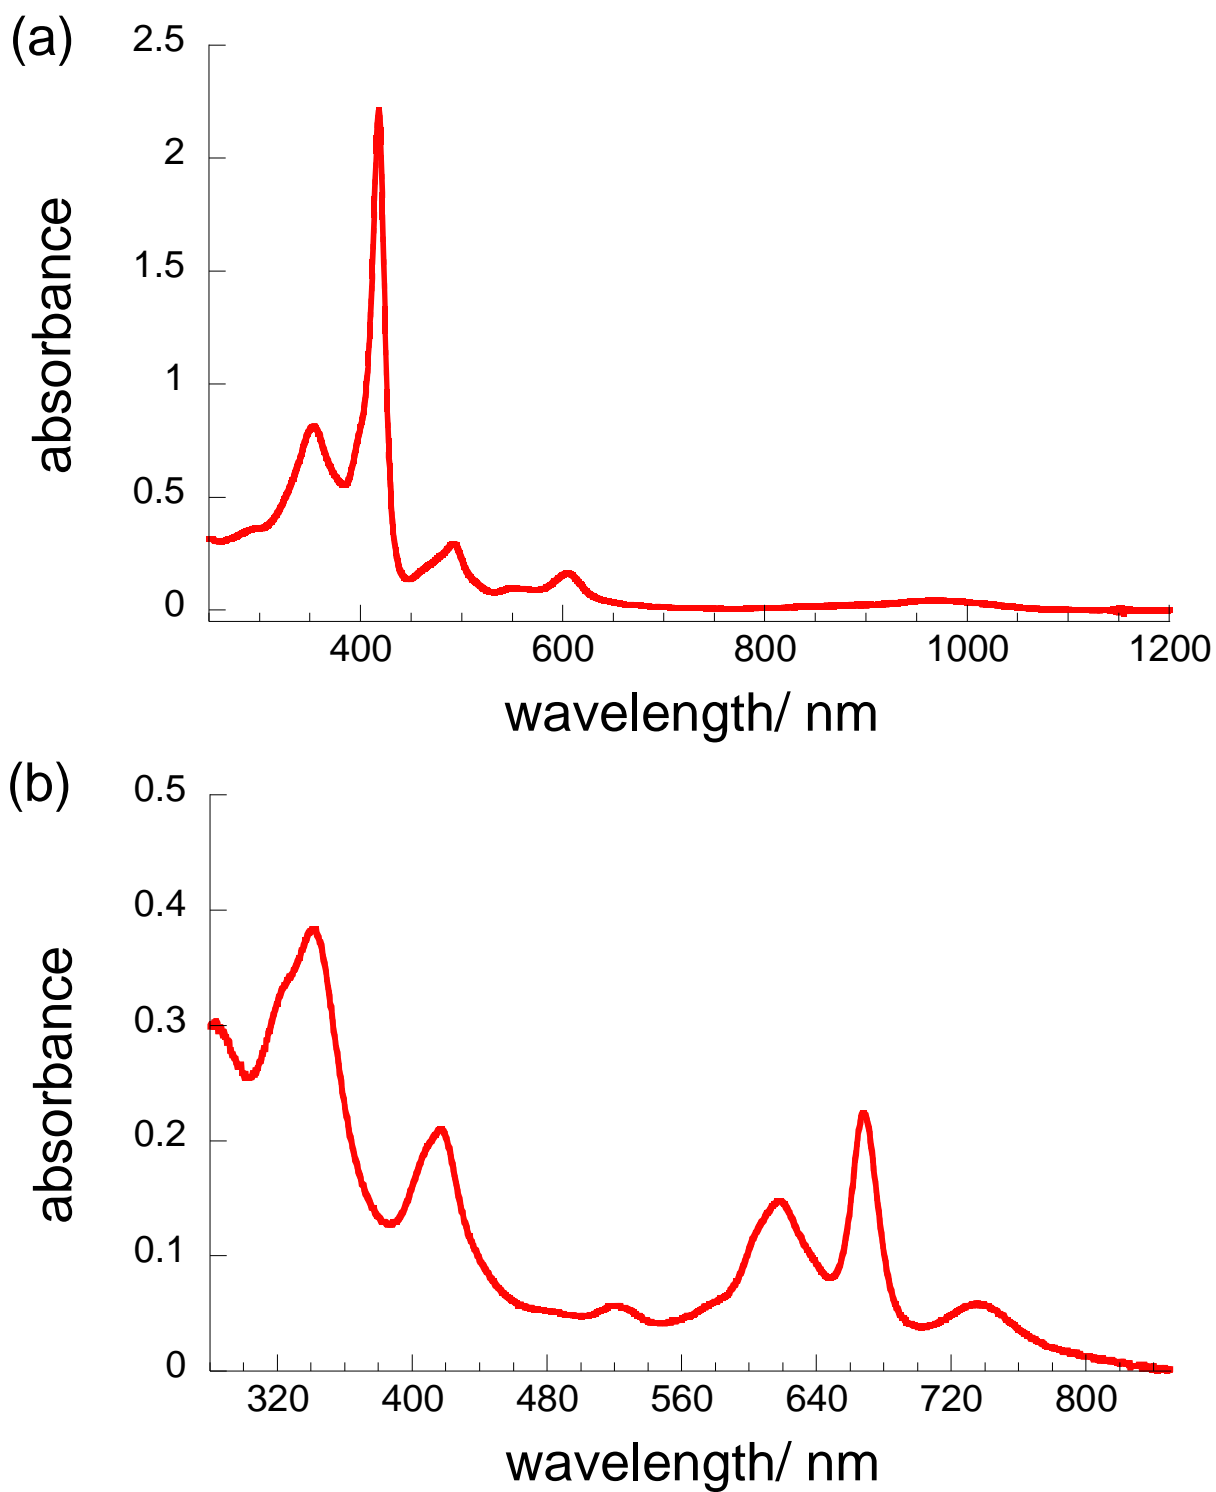

**Fig. S1** Electronic spectra of (a) **1** and (b) **2** in  $\text{CHCl}_3$  at 289 K.

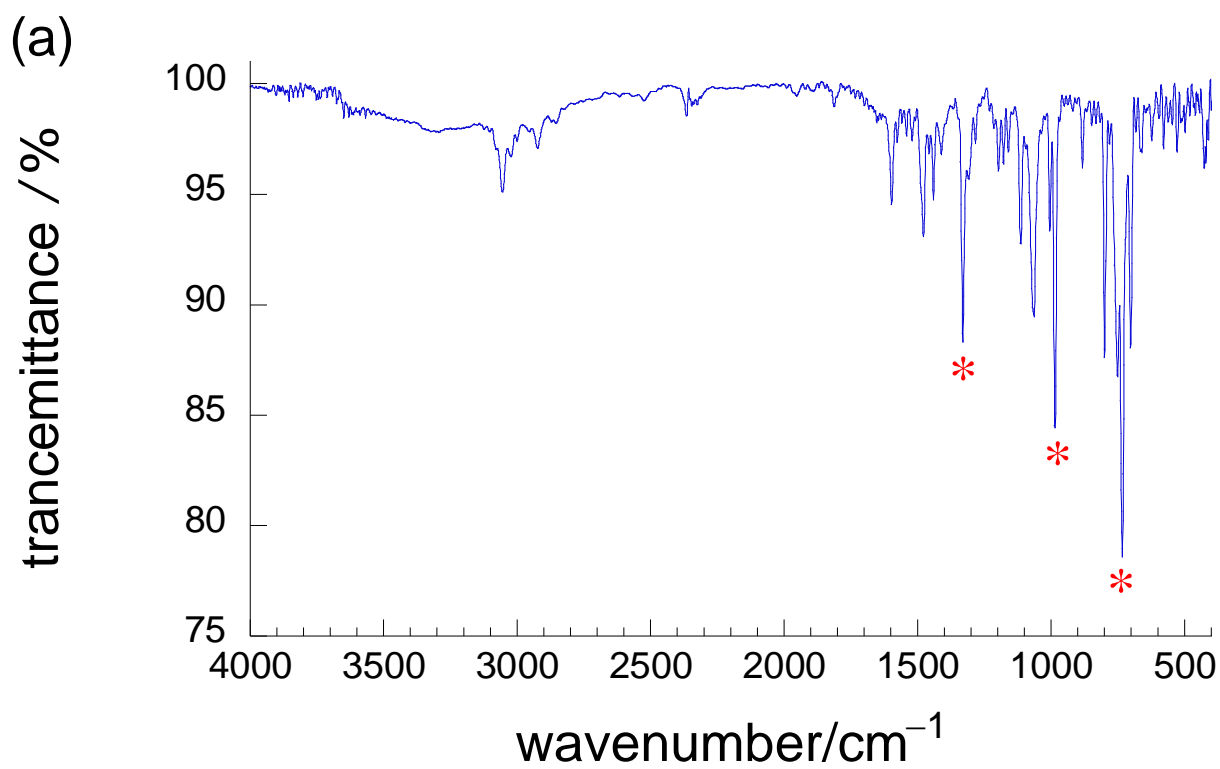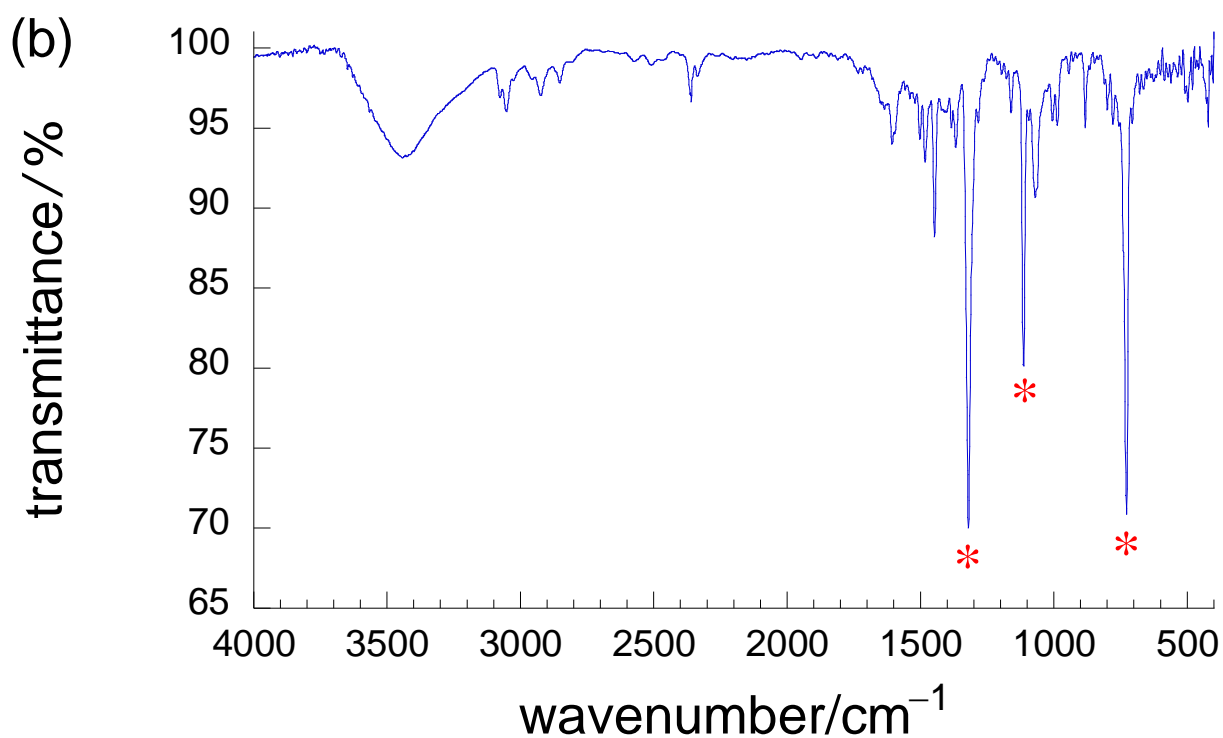

**Fig. S2** FT-IR spectra of (a) **1** and (b) **2** as KBr pellets at 289 K. Three main strong peaks (\*) at 1330, 1062, 728 cm<sup>-1</sup> were assigned to the Pc<sup>2-</sup>.<sup>1</sup>

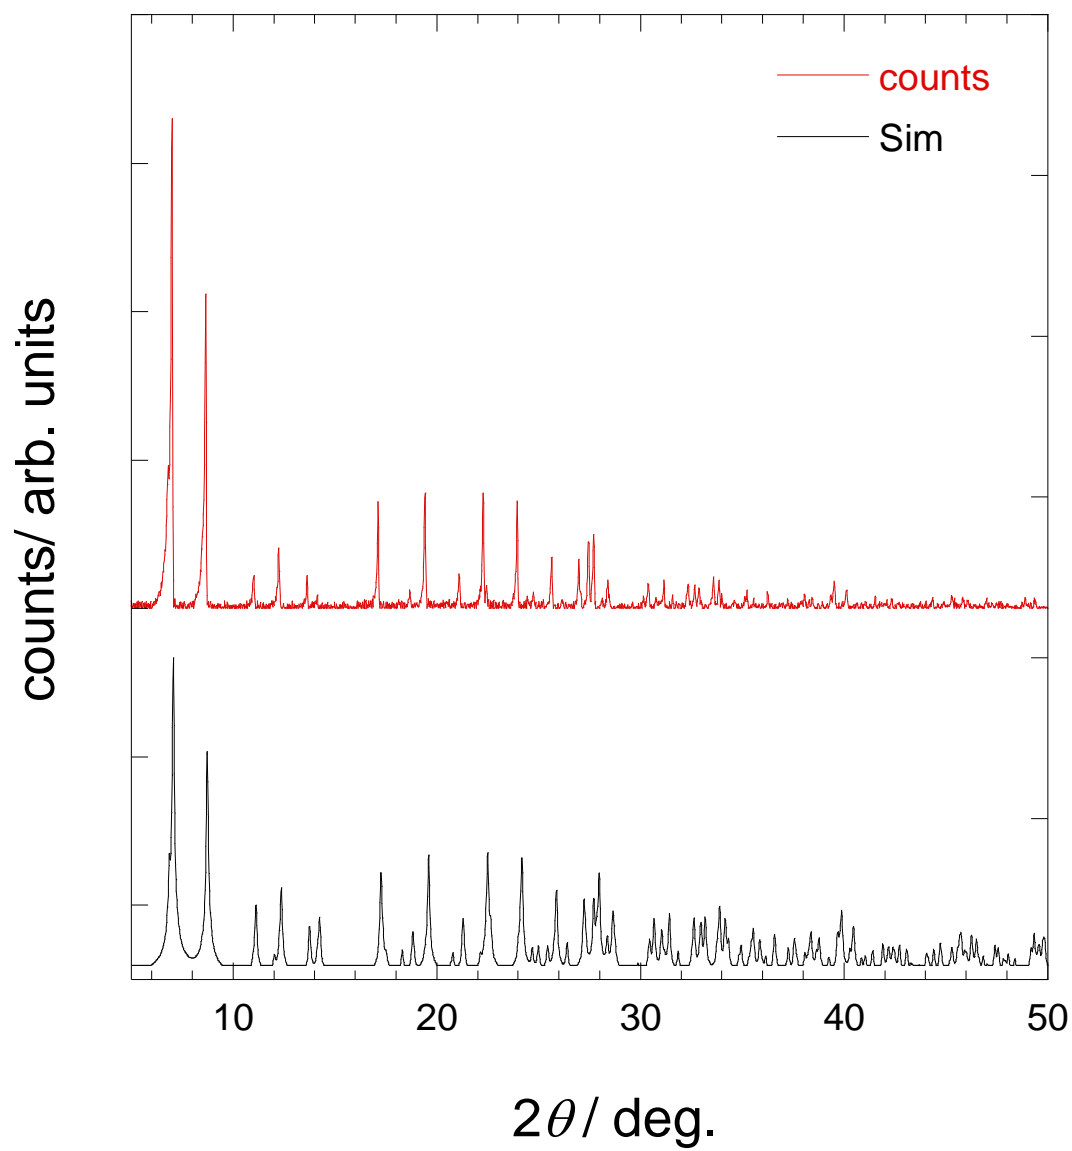

**Fig. S3-1** PXRd patterns of **1** at 293 K.

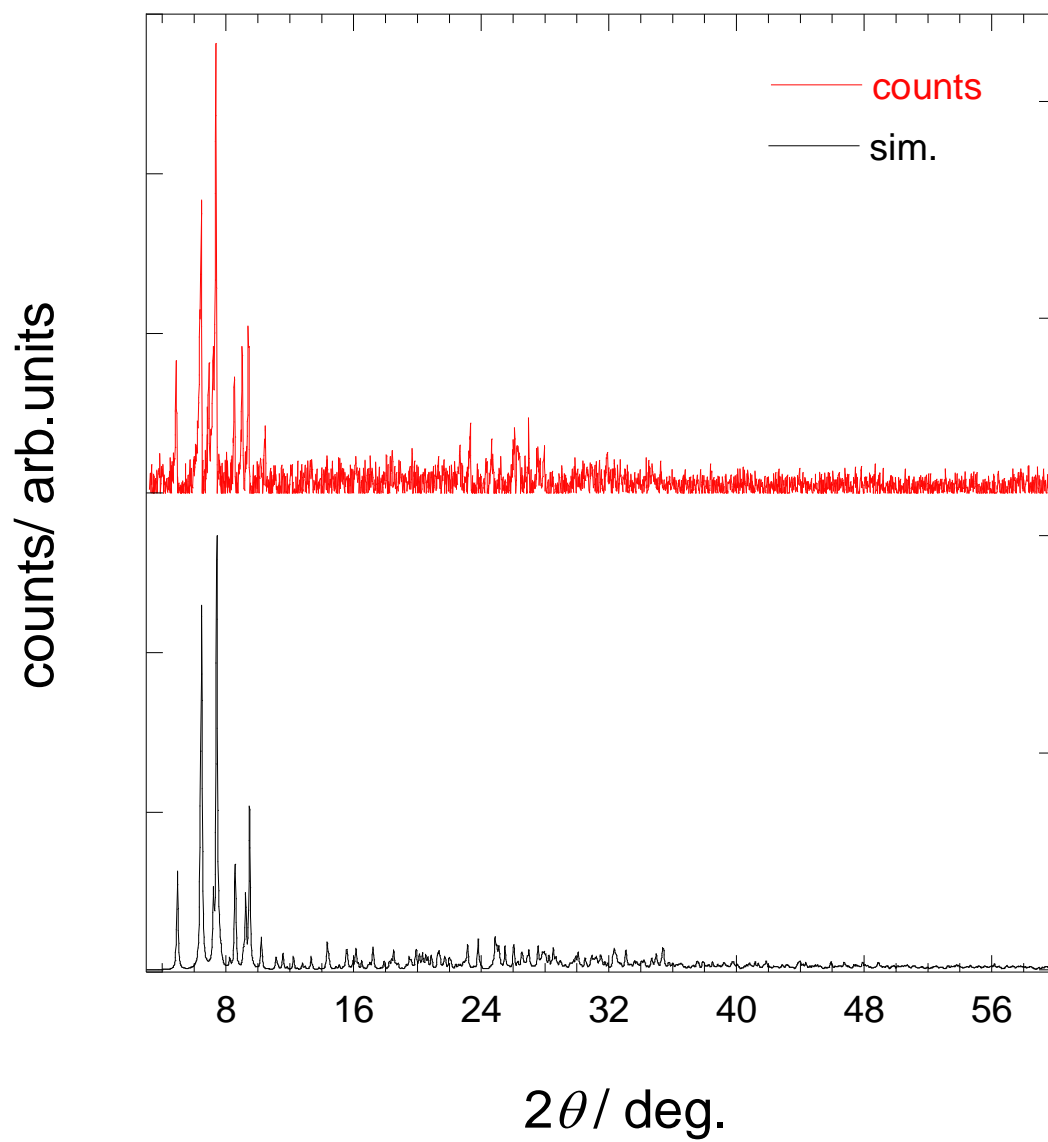

**Fig. S3-2** PXRd patterns of **2** at 293 K.

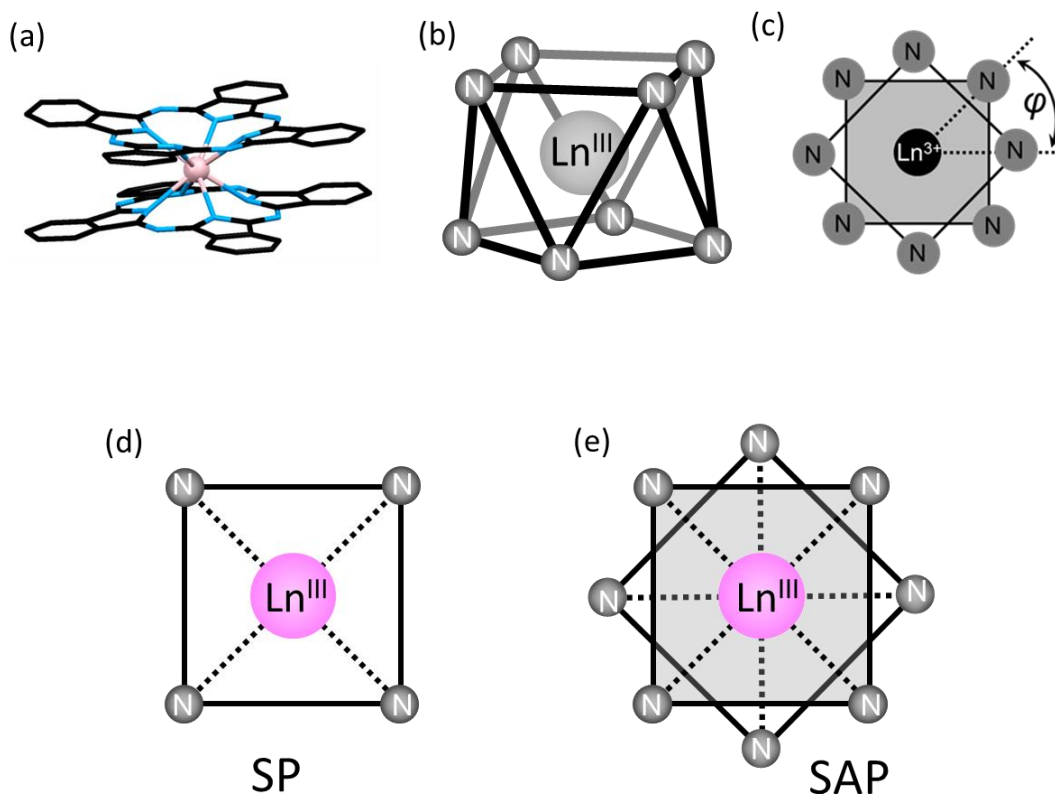

**Fig. S4** (a) Molecular structure of TbPc<sub>2</sub>. (b) Schematic illustration of the square-antiprismatic (SAP) coordination environment of LnPc<sub>2</sub>. (c) Twist angle  $\varphi$  in SAPs in multiple-decker Ln<sup>III</sup>-Pc complexes. (d) The square-prismatic (SP) coordination environment have  $D_{4h}$  point symmetry. (e) The square-antiprismatic (SAP) coordination environment have  $D_{4d}$  symmetry.

**Table S1.** Selected crystallographic data for **1–3**

|                                                             | <b>1</b> (CCDC 989974)                                                            | <b>2</b> (CCDC 1041202)                                                          | <b>3</b> (CCDC 753306)                                                            |
|-------------------------------------------------------------|-----------------------------------------------------------------------------------|----------------------------------------------------------------------------------|-----------------------------------------------------------------------------------|
| Chemical formula                                            | C <sub>124</sub> H <sub>72</sub> N <sub>16</sub> Cl <sub>12</sub> Tb <sub>2</sub> | C <sub>110</sub> H <sub>62</sub> N <sub>20</sub> Cl <sub>6</sub> Tb <sub>2</sub> | C <sub>196</sub> H <sub>250</sub> N <sub>24</sub> O <sub>26</sub> Tb <sub>2</sub> |
| Formula weight                                              | 2529.22                                                                           | 2194.34                                                                          | 3678.06                                                                           |
| <i>T</i> /K                                                 | 93                                                                                | 93                                                                               | 93                                                                                |
| Crystal system                                              | tetragonal                                                                        | monoclinic                                                                       | triclinic                                                                         |
| Space group                                                 | <i>I4/m</i>                                                                       | <i>P2<sub>1</sub>/c</i>                                                          | <i>P</i> -1                                                                       |
| <i>a</i> / nm                                               | 1.4314(6)                                                                         | 1.3800(3)                                                                        | 1.31648(11)                                                                       |
| <i>b</i> / nm                                               | 1.4314(6)                                                                         | 2.7638(6)                                                                        | 1.78266(17)                                                                       |
| <i>c</i> / nm                                               | 2.5736(12)                                                                        | 2.3522(5)                                                                        | 2.06226(19)                                                                       |
| $\alpha$ / deg.                                             | 90.00                                                                             | 90.00                                                                            | 107.2150(10)                                                                      |
| $\beta$ / deg.                                              | 90.00                                                                             | 98.391(3)                                                                        | 90.5010(10)                                                                       |
| $\gamma$ / deg.                                             | 90.00                                                                             | 90.00                                                                            | 100.8480(10)                                                                      |
| <i>V</i> / nm <sup>3</sup>                                  | 5.273(4)                                                                          | 8.876(3)                                                                         | 4.5296(7)                                                                         |
| <i>Z</i>                                                    | 2                                                                                 | 4                                                                                | 1                                                                                 |
| <i>R</i> <sub>1</sub> ( <i>I</i> > 2 <i>s</i> ( <i>I</i> )) | 0.0296                                                                            | 0.0761                                                                           | 0.0470                                                                            |
| <i>wR</i> <sub>2</sub> (all)                                | 0.0888                                                                            | 0.1859                                                                           | 0.1357                                                                            |
| GOF                                                         | 1.219                                                                             | 1.109                                                                            | 1.088                                                                             |

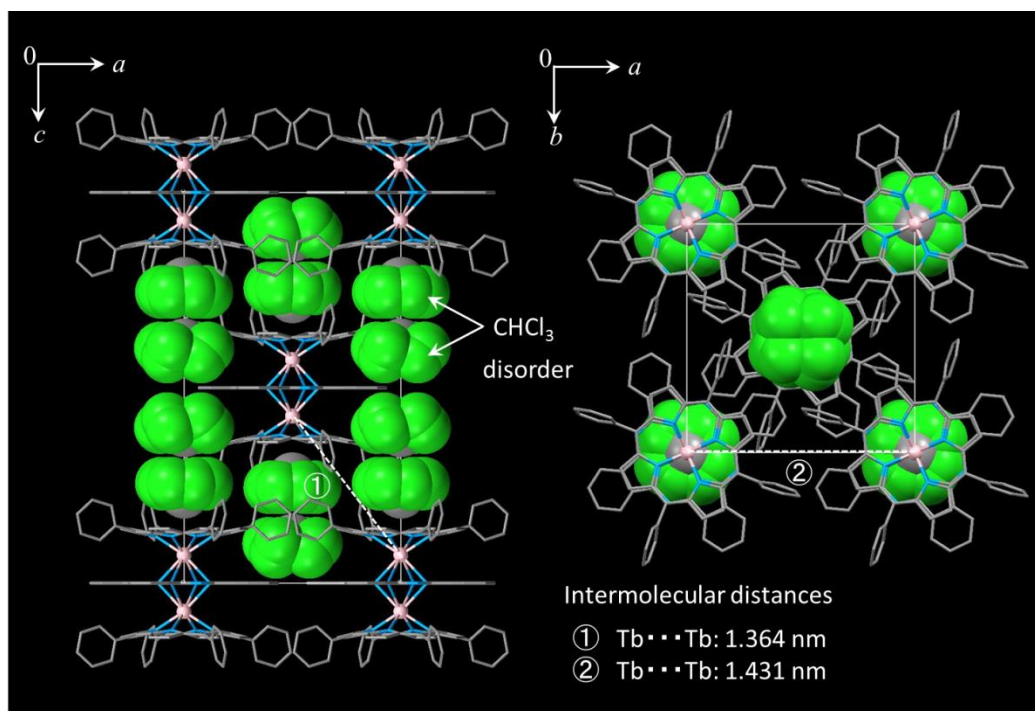

**Fig. S5** Packing diagram of **1**.  $C_4$  symmetrical disorder of the chloride atoms on chloroform is observed. The chloroform has  $C_{3v}$  symmetry. The unusual  $C_4$  symmetry of chloroform observed in the single crystal of **1** is related to the strong intermolecular CH/π interactions between the chloroform and the point group  $D_4$  (it has one  $C_4$  axis) symmetric TTP ligand in **1**.

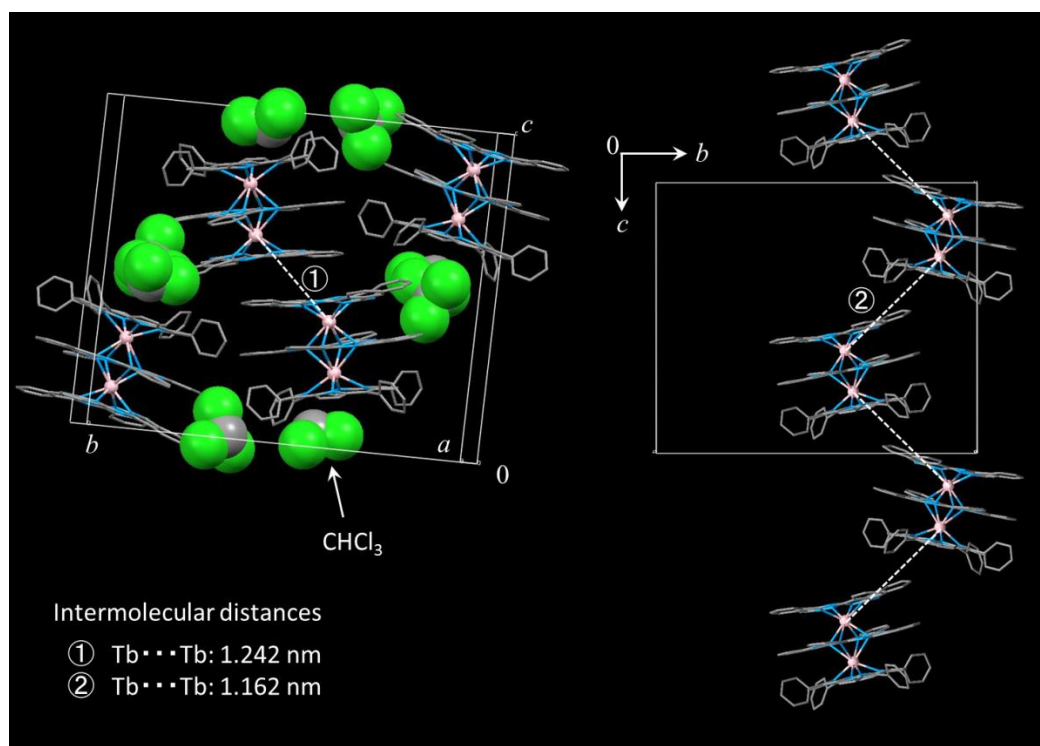

**Fig. S6-1** Packing diagram for **2**.



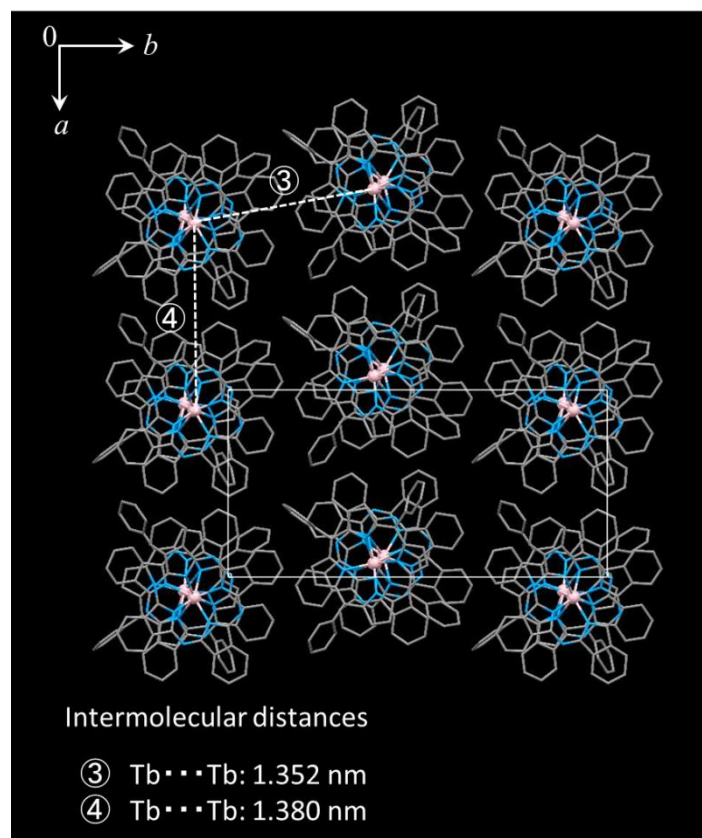

**Fig. S6-2** Packing diagram for **2**.

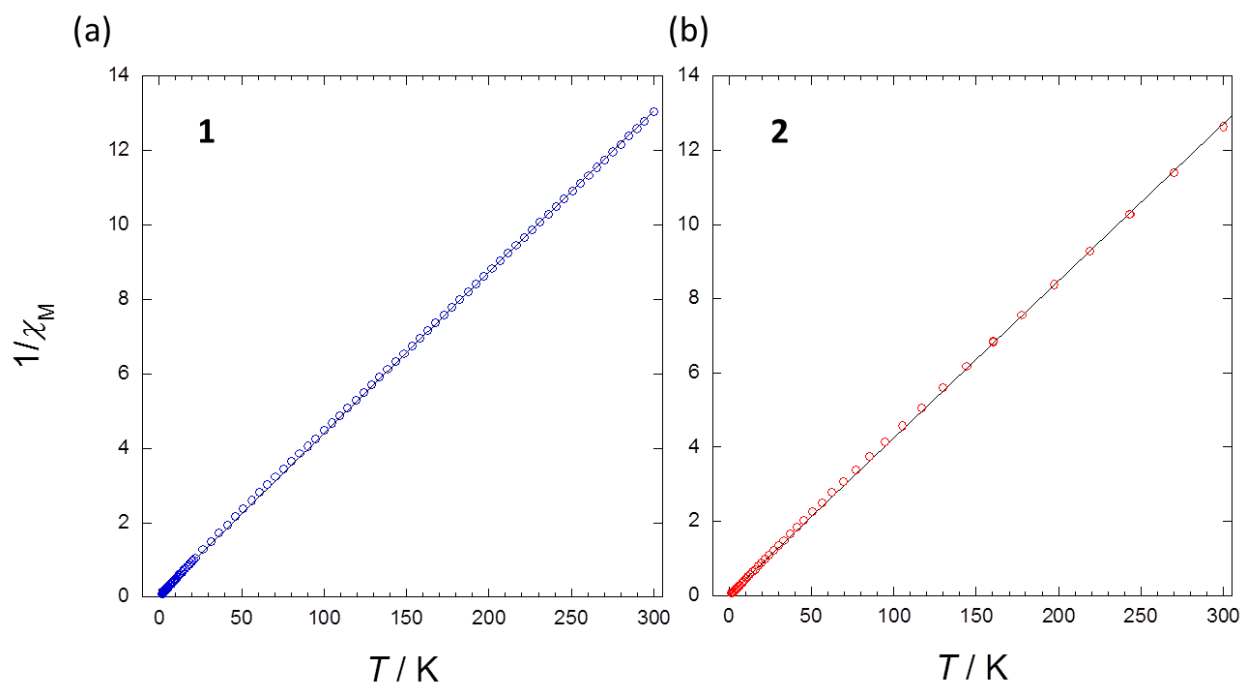

**Fig. S7**  $1/\chi_M$  versus  $T$  plots for (a) **1** and (b) **2**. Black solid lines are linear fits of the data. The fitting parameters are listed in the main text.

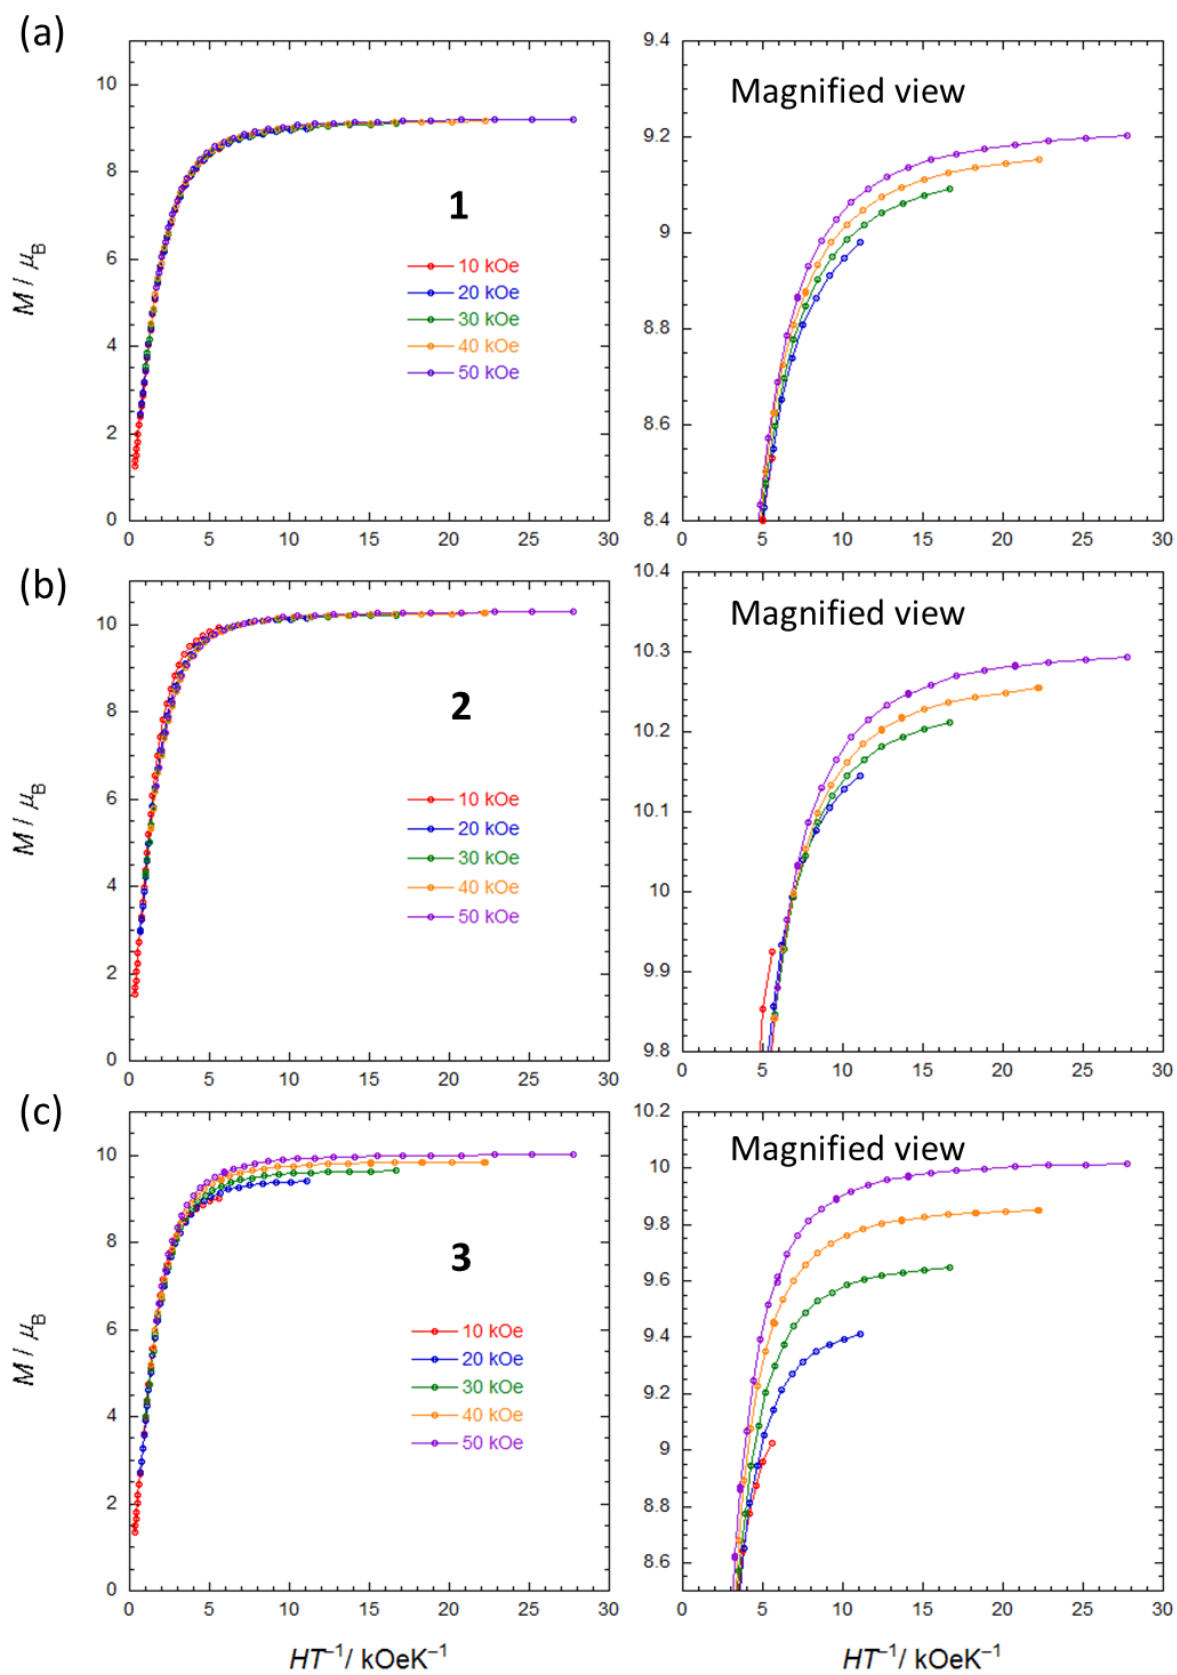

**Fig. S8-1** Field dependence of the magnetization measured on powder samples of (a) **1**, (b) **2** and (c) **3**, corrected from 1.8 to 30 K. The solid lines are guides only.

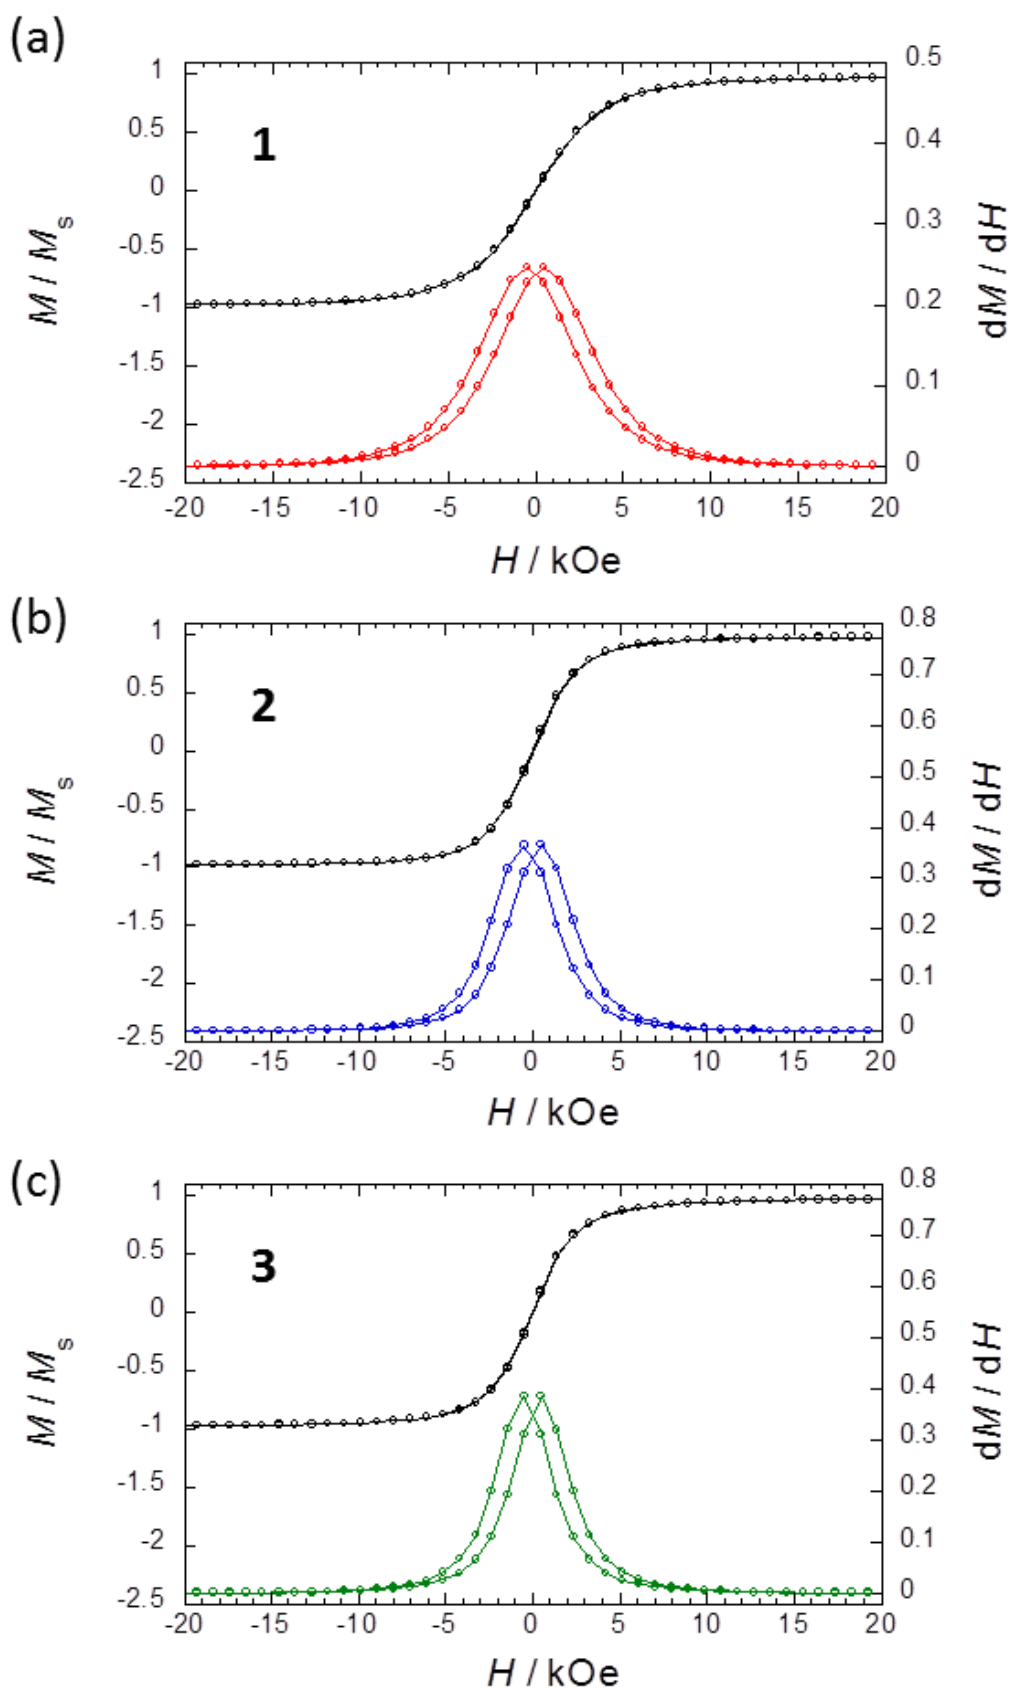

**Fig. S8-2** Field dependence of the magnetization measured on powder samples of 1–3, in which slight hystereses were observed at 1.8 K. The solid lines are guides only.

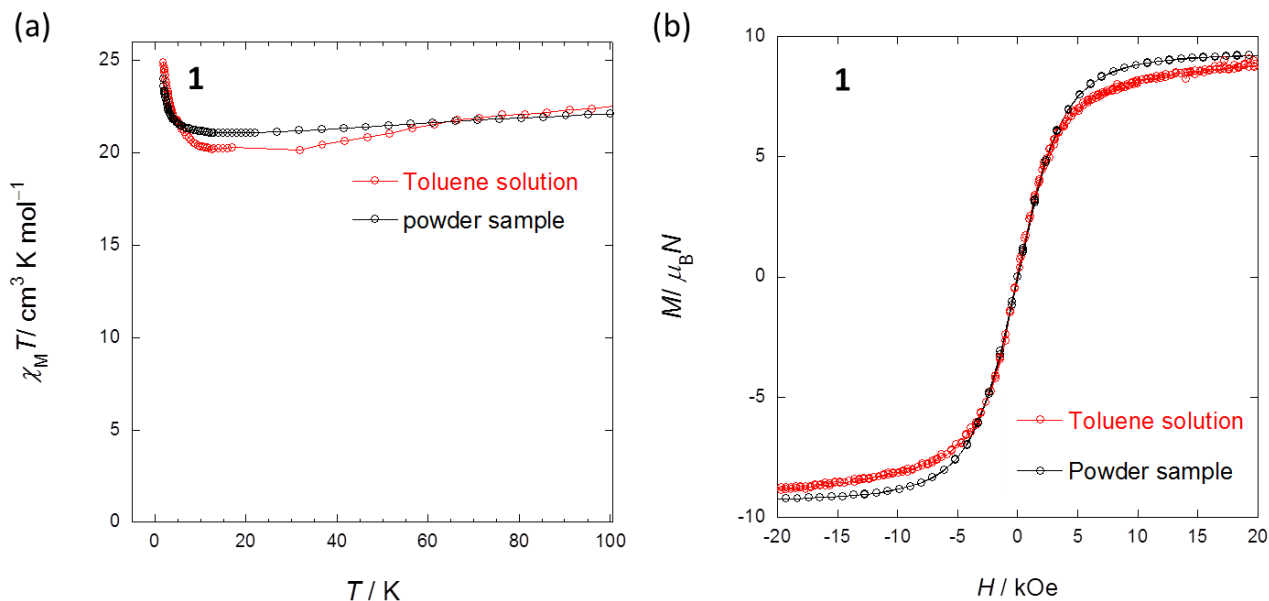

**Fig. S9-1** (a)  $\chi_M T$  versus  $T$  plots for **1**. The solution sample was prepared by mass ratio of **1** (5 mg) and toluene (1.8 mL). Open black circles are powder sample of **1**, and open red circles are solution sample of **1** (diluted sample). (b) The field dependence of the magnetization measured on powder (open black circles) and solution samples of **1** (open red circles). The solid lines are guides only.

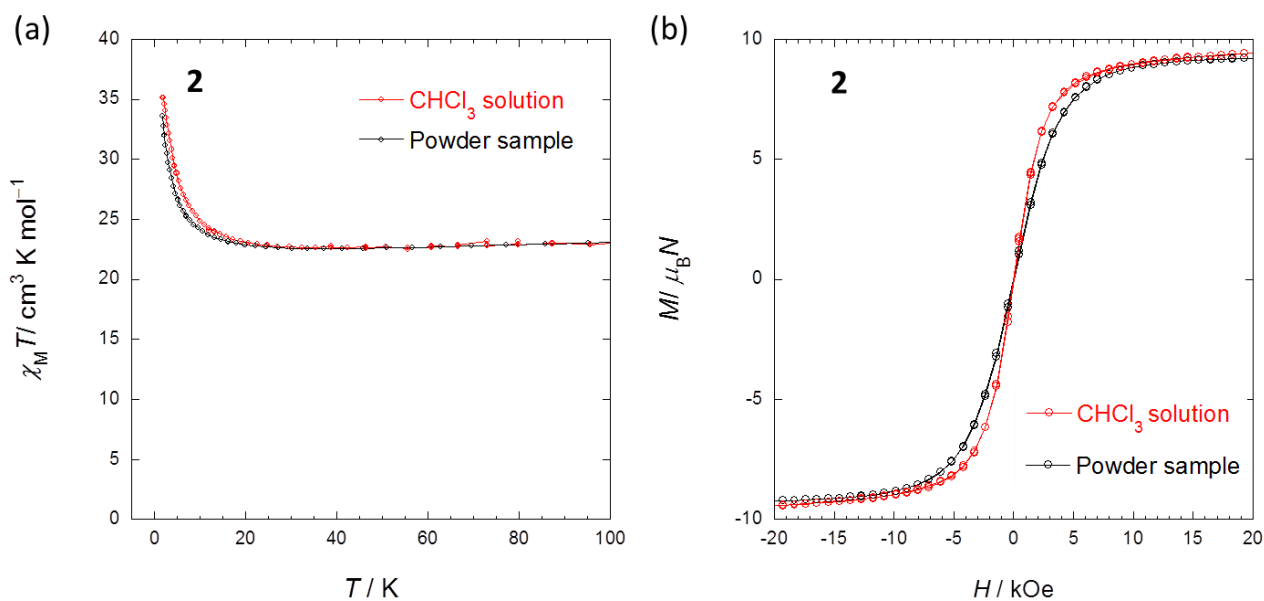

**Fig. S9-2** (a)  $\chi_M T$  versus  $T$  plots for **2**. Solution samples were prepared by using mass ratio of **2** (5 mg) and toluene (1.8 mL). Open black circles are powder sample of **2**, and open red circles are solution sample of **2** (diluted sample). (b) The field dependence of the magnetization was measured on powder (open black circles) and solution sample of **2** (open red circles). The solid lines are guides only.

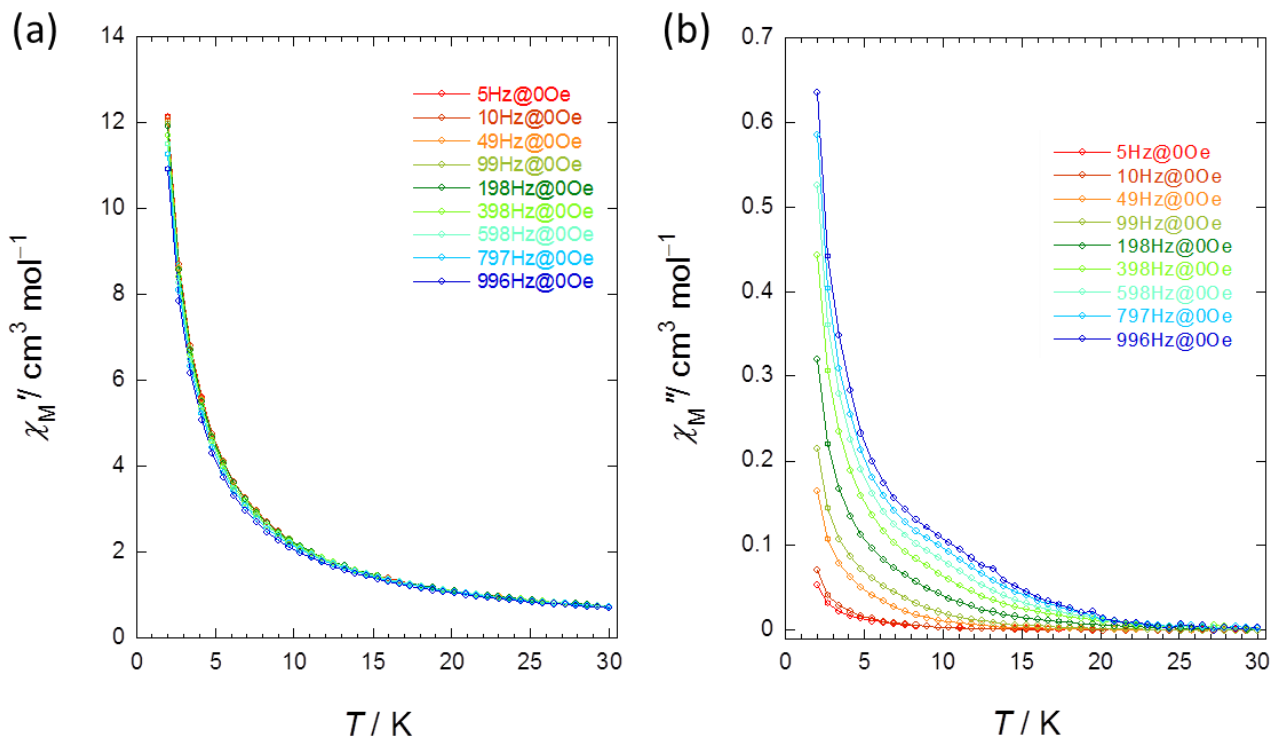

**Fig. S10** Frequency ( $\nu$ ) and temperature ( $T$ ) dependences of the (a) in-phase ( $\chi_M'$ ) and (b) out-of-phase ( $\chi_M''$ ) ac magnetic susceptibilities of **1** in a zero dc field. The solid lines are guides only.

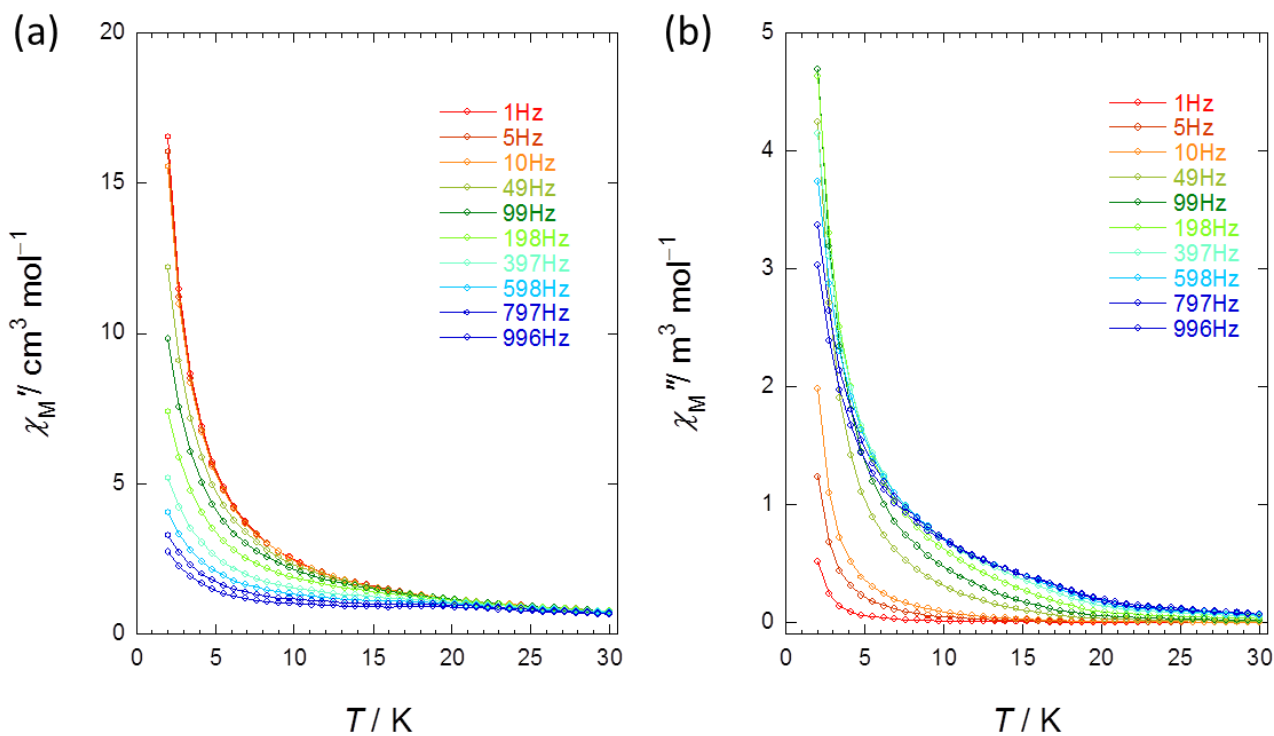

**Fig. S11** Frequency ( $\nu$ ) and temperature ( $T$ ) dependences of the (a) in-phase ( $\chi_M'$ ) and (b) out-of-phase ( $\chi_M''$ ) ac magnetic susceptibilities of **2** at zero dc field. The solid lines are guides only.

## The Kramers-Kronig equation<sup>2-5</sup>

$$\frac{\chi'}{\chi''} = \omega\tau \quad (\text{eq. S1})$$

$$\frac{\chi'}{\chi''} = \omega\tau_0 + \exp\left(\frac{\Delta}{k_B T}\right) \quad (\text{eq. S2})$$

$$\ln\left(\frac{\chi'}{\chi''}\right) = \ln(\omega\tau_0) + \frac{\Delta}{k_B T} \quad (\text{eq. S3})$$

$\chi'$  : real part of ac magnetic susceptibility

$\chi''$  : imaginary part of ac magnetic susceptibility

$\omega$  : the experimental ac field exciting frequency

$\Delta$  : the effective energy barrier

$\tau$  : the magnetic relaxation time

$k_B$ : Boltzmann constant

**Table S2.** Selected values of  $\Delta$  and  $\tau_0$  for **1**

|                            |                       |                       |                      |                      |                      |
|----------------------------|-----------------------|-----------------------|----------------------|----------------------|----------------------|
| $\nu$ / Hz                 | 198                   | 398                   | 598                  | 797                  | 996                  |
| $\Delta$ /cm <sup>-1</sup> | 18.7                  | 17.8                  | 20.9                 | 21.1                 | 23.4                 |
| $\tau_0$ /s                | $1.35 \times 10^{-6}$ | $1.26 \times 10^{-6}$ | $8.1 \times 10^{-7}$ | $7.5 \times 10^{-7}$ | $5.7 \times 10^{-7}$ |

**Table S3.** Selected values of  $\Delta$  and  $\tau_0$  for **2**

|                            |                       |                       |                       |                       |                       |
|----------------------------|-----------------------|-----------------------|-----------------------|-----------------------|-----------------------|
| $\nu$ / Hz                 | 198                   | 398                   | 598                   | 797                   | 996                   |
| $\Delta$ /cm <sup>-1</sup> | 37.8                  | 38.0                  | 37.8                  | 36.4                  | 36.0                  |
| $\tau_0$ /s                | $4.52 \times 10^{-6}$ | $3.48 \times 10^{-6}$ | $2.92 \times 10^{-6}$ | $2.82 \times 10^{-6}$ | $2.61 \times 10^{-6}$ |

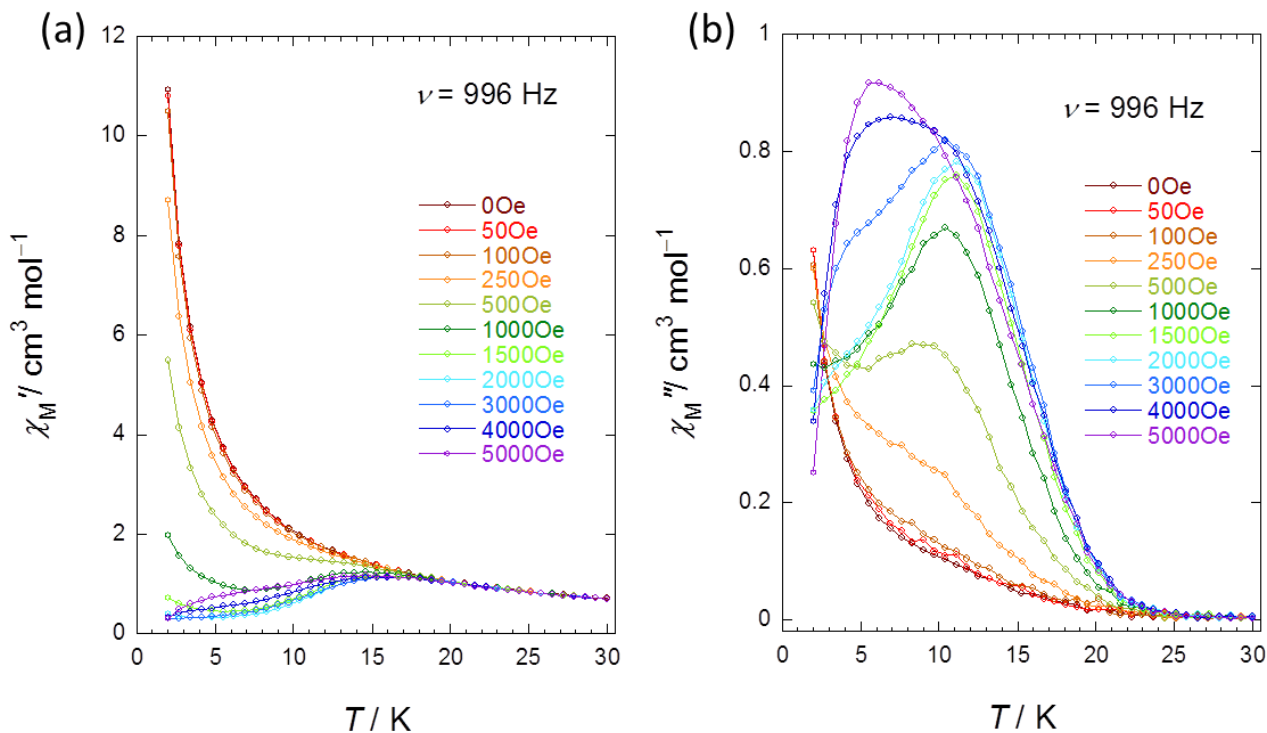

**Fig. S12** Frequency ( $\nu$ ) and temperature ( $T$ ) dependences of the (a) in-phase ( $\chi_M'$ ) and (b) out-of-phase ( $\chi_M''$ ) ac magnetic susceptibilities of **1** at 996 Hz in several dc magnetic fields. The solid lines are guides only.

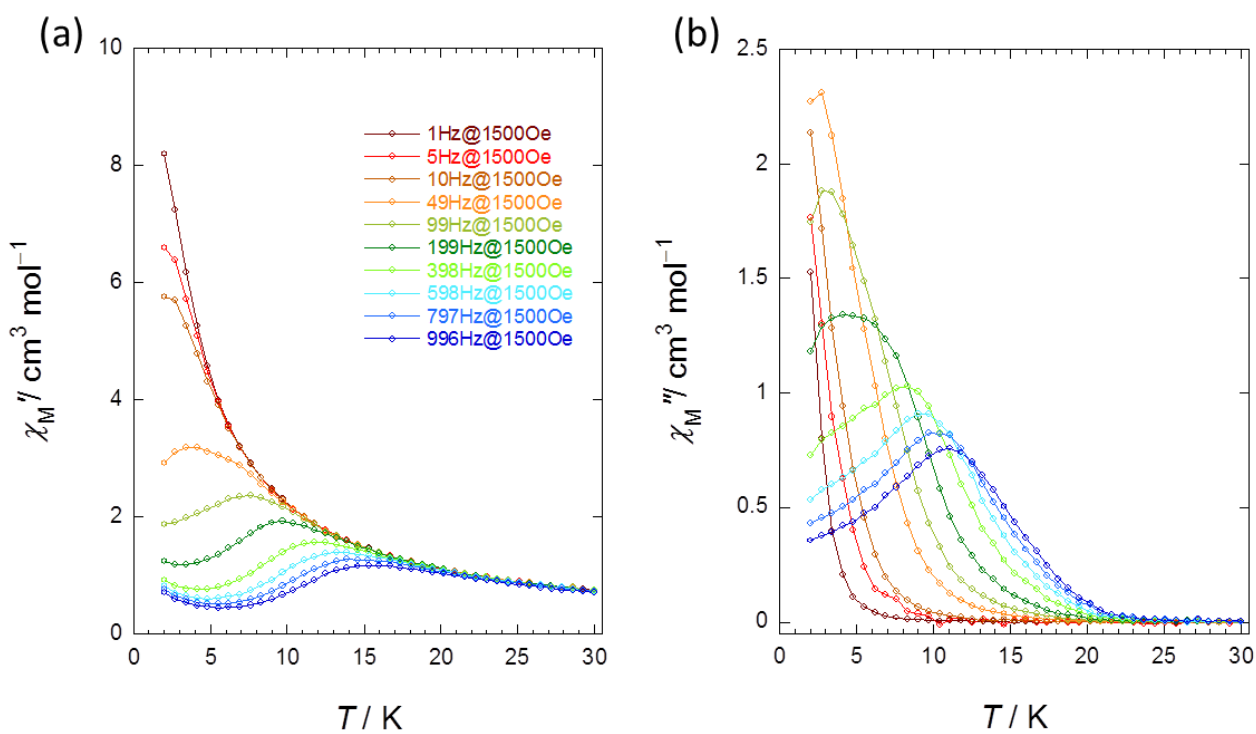

**Fig. S13-1** Frequency ( $\nu$ ) and temperature ( $T$ ) dependences of the (a) in-phase ( $\chi_M'$ ) and (b) out-of-phase ( $\chi_M''$ ) ac magnetic susceptibilities of **1** at 1500 Oe. The solid lines are guides only.

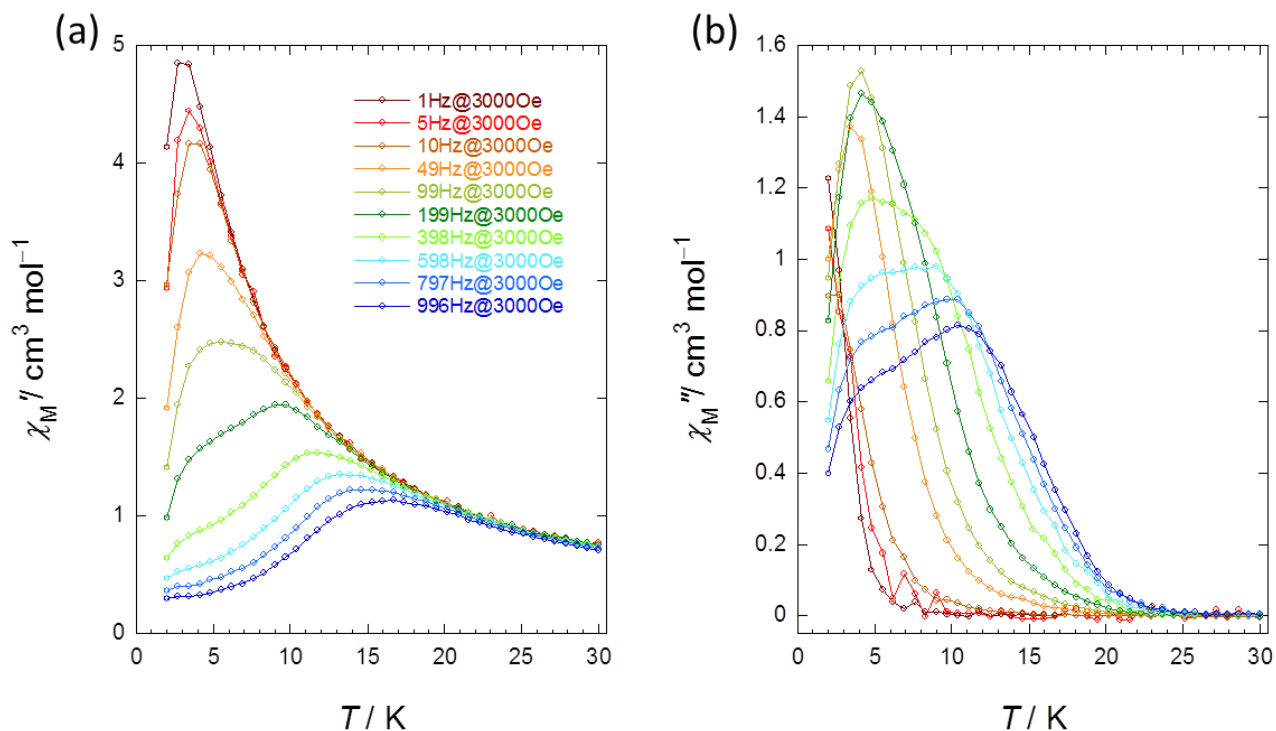

**Fig. S13-2** Frequency ( $\nu$ ) and temperature ( $T$ ) dependences of the (a) in-phase ( $\chi_M'$ ) and (b) out-of-phase ( $\chi_M''$ ) ac magnetic susceptibilities of **1** at 3000 Oe. The solid lines are guides only.

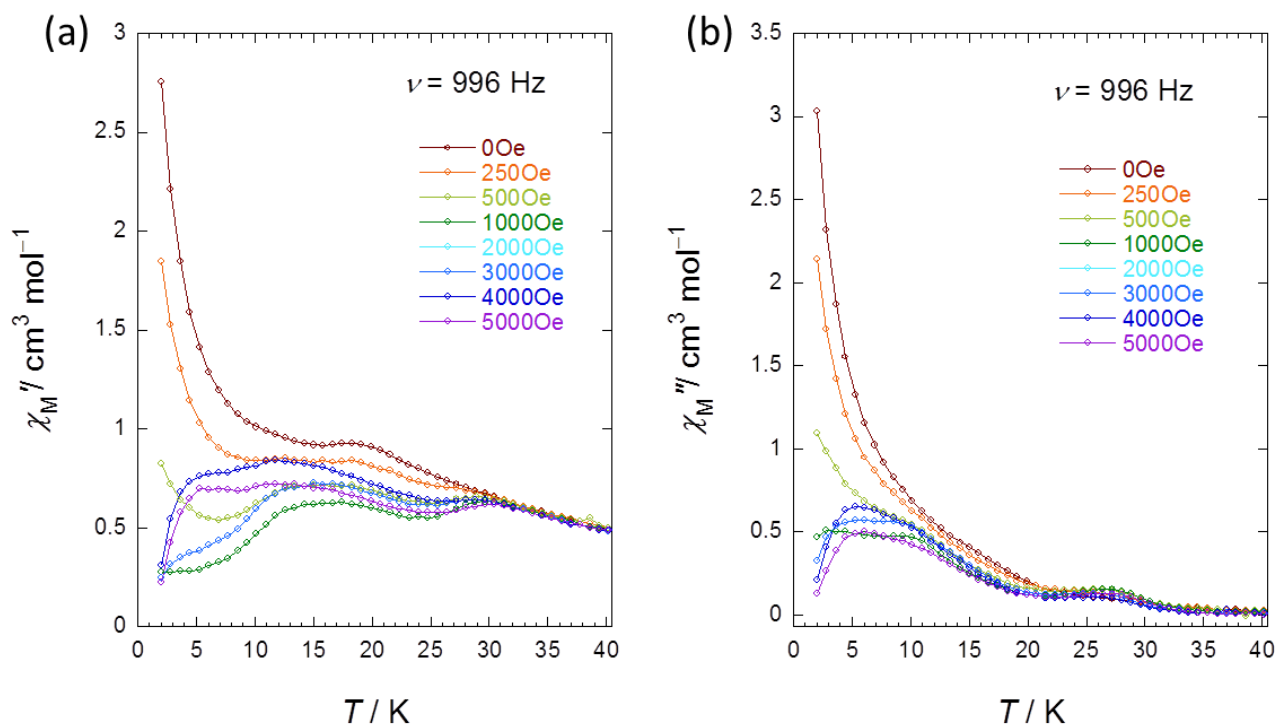

**Fig. S14** Frequency ( $\nu$ ) and temperature ( $T$ ) dependences of the (a) in-phase ( $\chi_M'$ ) and (b) out-of-phase ( $\chi_M''$ ) ac magnetic susceptibilities of **2** at 996 Hz in several dc magnetic fields. The solid lines are guides only.



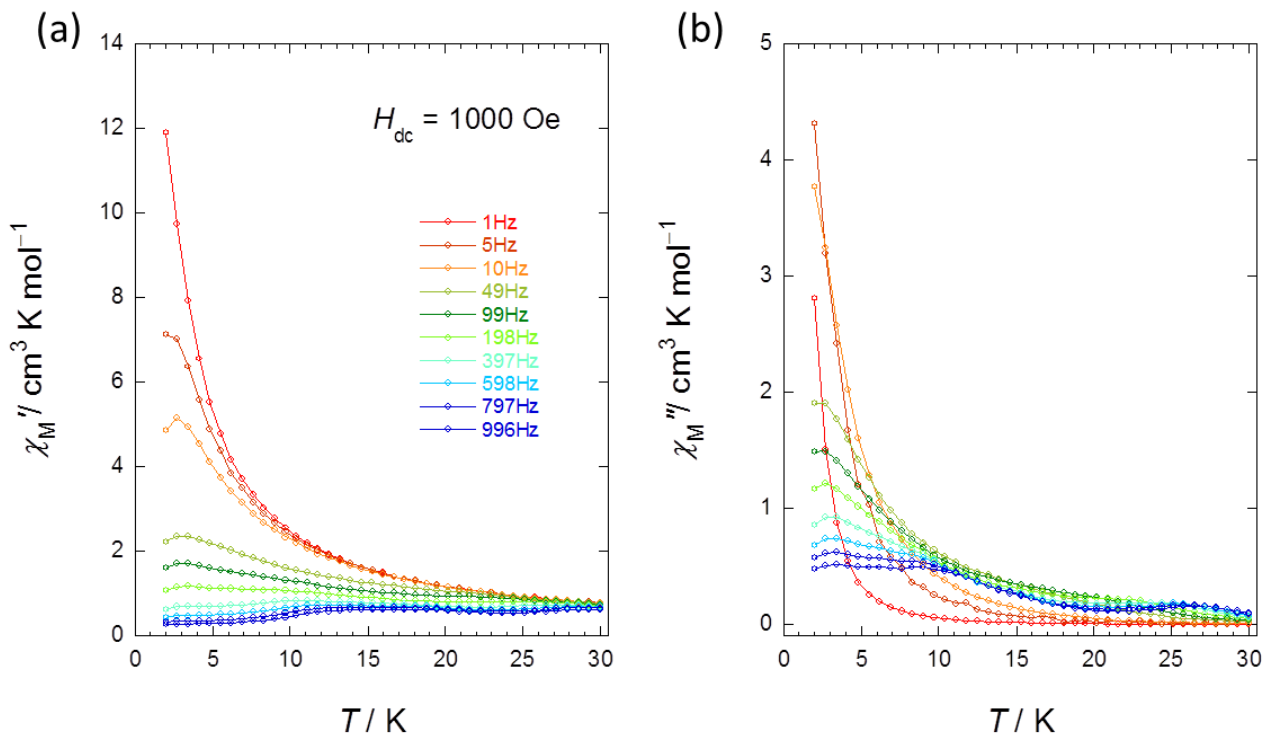

**Fig. S15** Frequency ( $\nu$ ) and temperature ( $T$ ) dependences of the (a) in-phase ( $\chi_M'$ ) and (b) out-of-phase ( $\chi_M''$ ) ac magnetic susceptibilities of **2** at 1000 Oe. The solid lines are guides only.

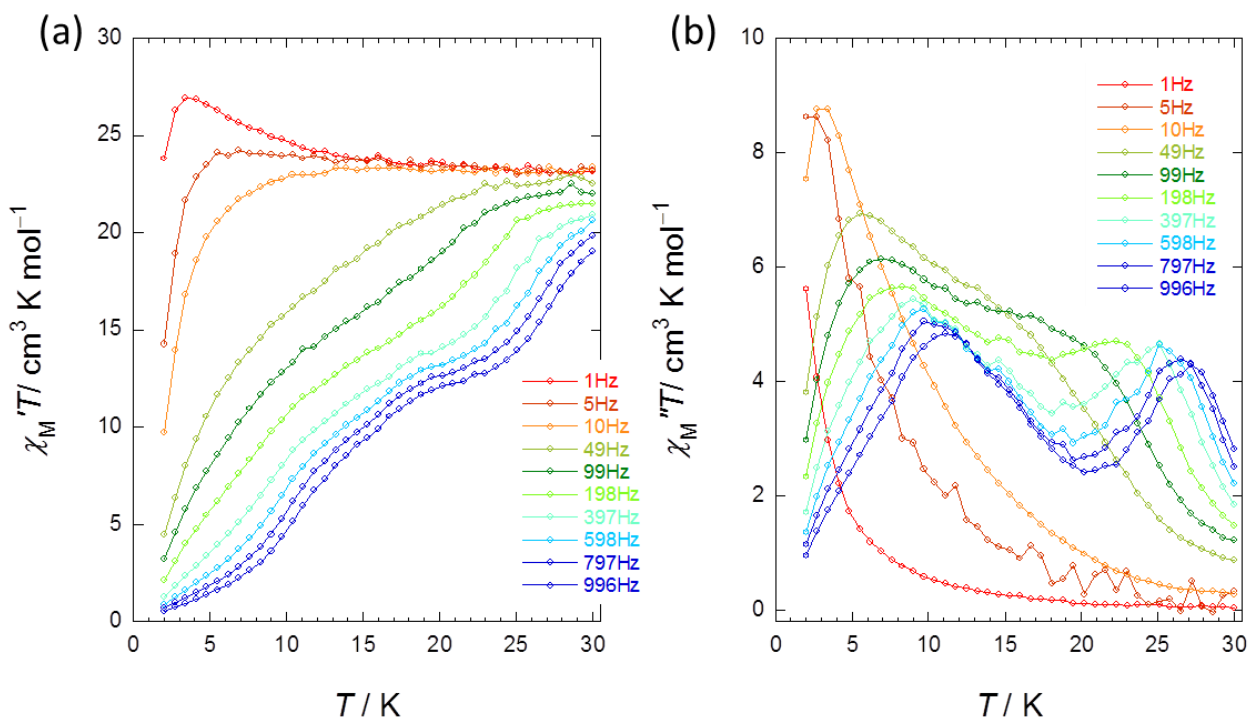

**Fig. S16** Frequency ( $\nu$ ) and temperature ( $T$ ) dependences of the ac magnetic susceptibilities of **2** at 1000 Oe: (a)  $\chi_M' T$  and (b)  $\chi_M'' T$ . The solid lines are guides only.

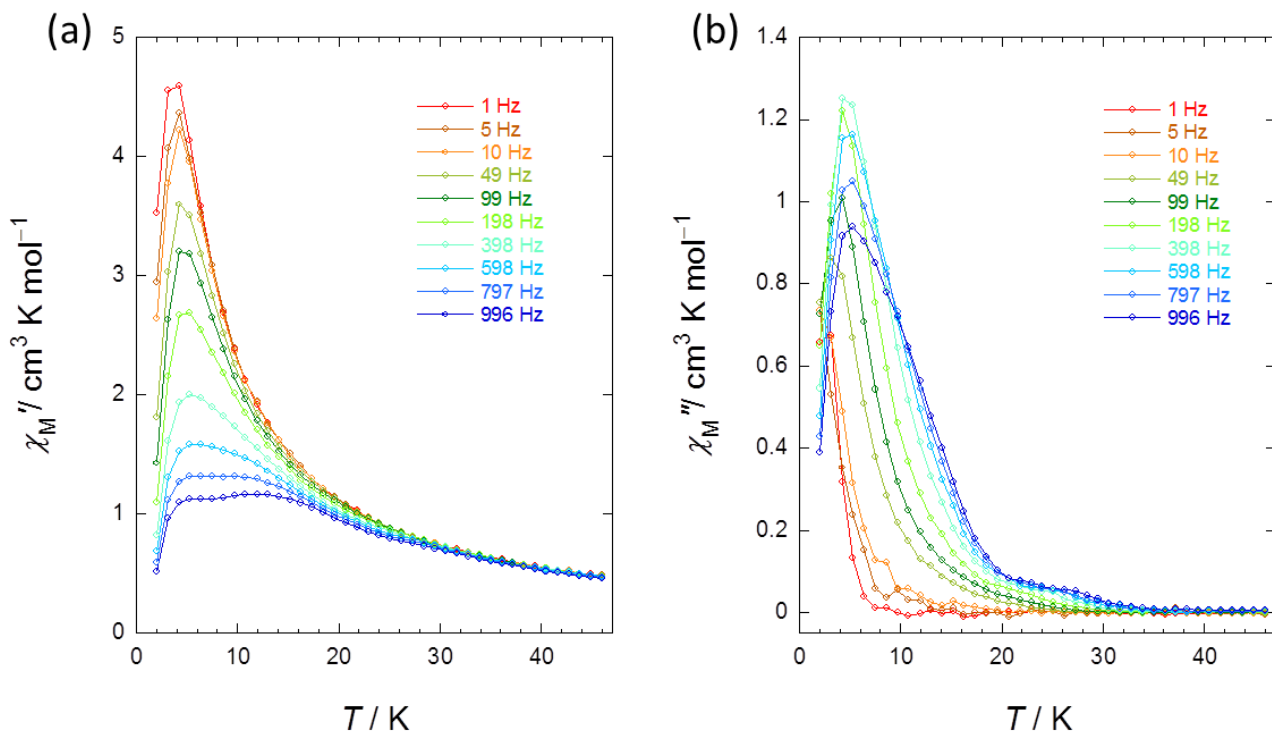

**Fig. S17** Frequency ( $\nu$ ) and temperature ( $T$ ) dependences of the (a) in-phase ( $\chi_M'$ ) and (b) out-of-phase ( $\chi_M''$ ) ac magnetic susceptibilities of **2** at 3000 Oe. The solid lines are guides only.

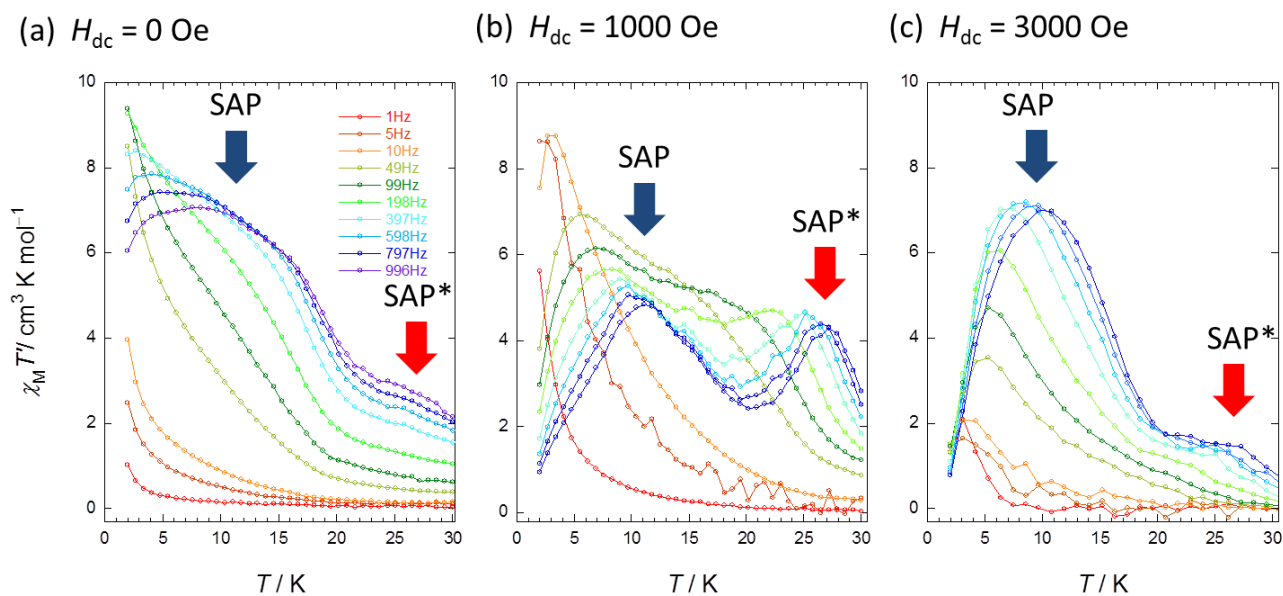

**Fig. S18** Frequency ( $\nu$ ) and temperature ( $T$ ) dependences of  $\chi_M''$  of **2** (SAP = Site A, SAP\* = Site B). (a)  $H_{dc} = 0$ , (b) 1000, and (c) 3000 Oe. The solid lines are guides only.

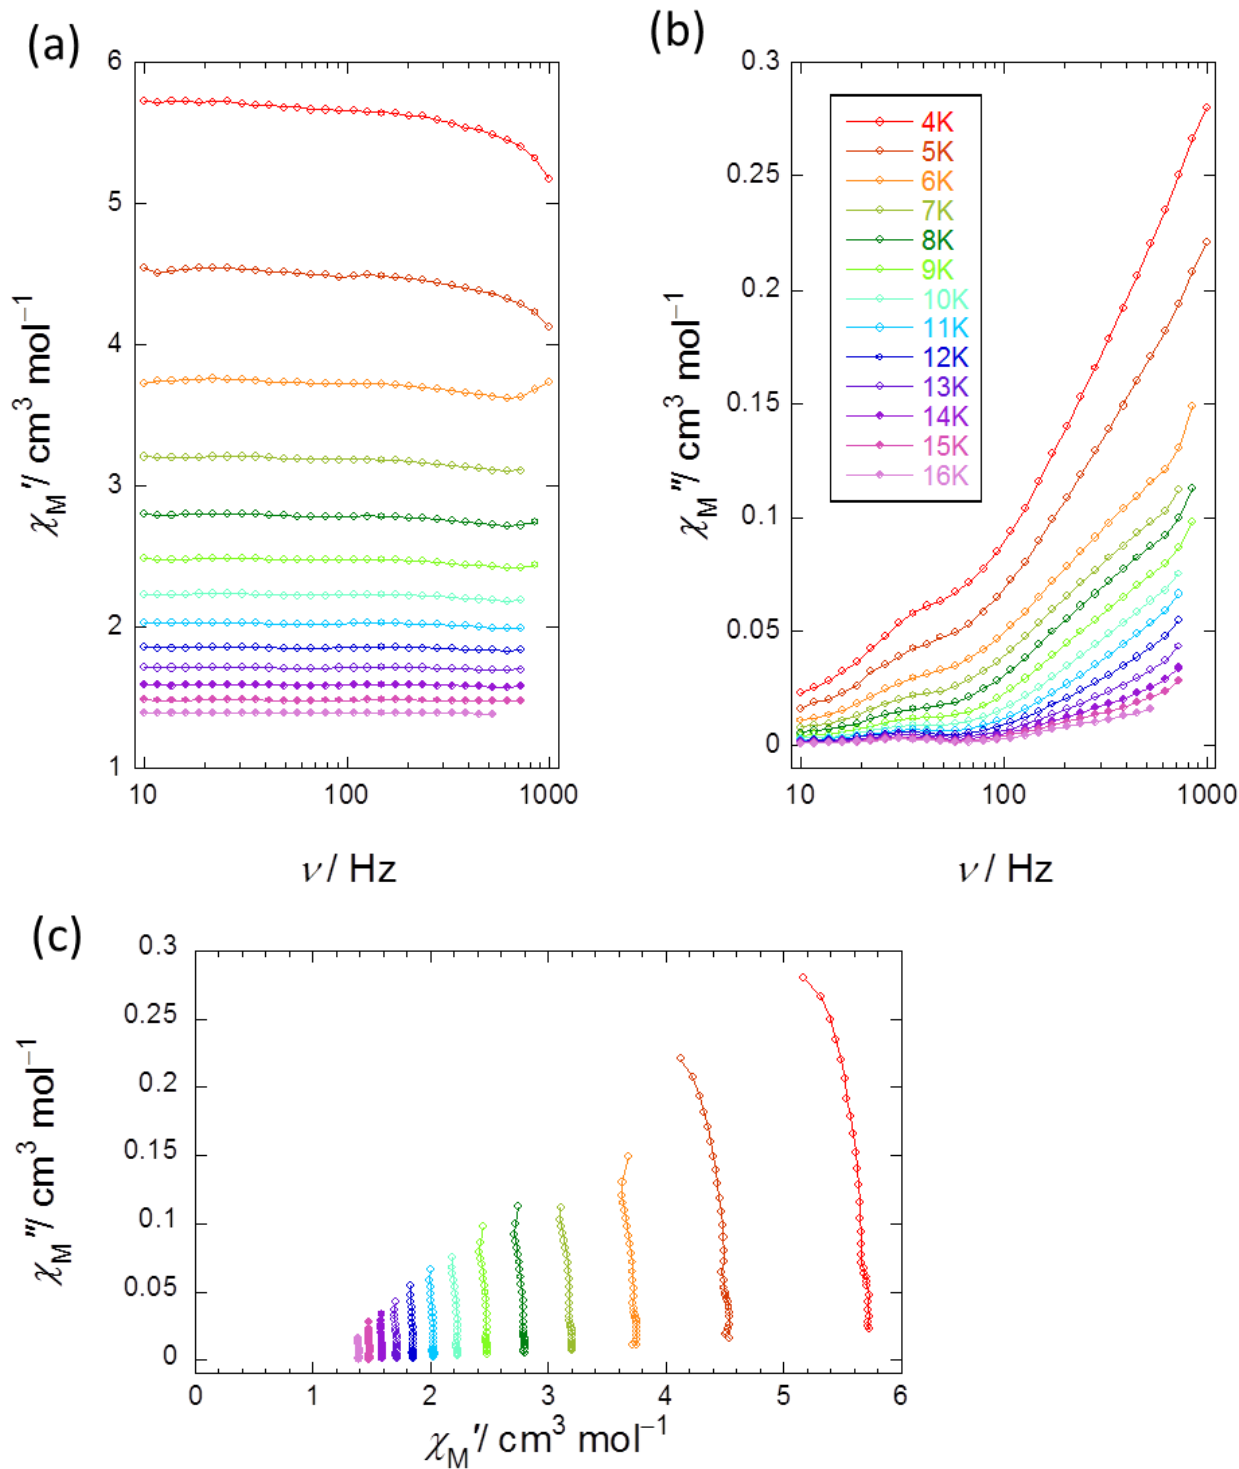

**Fig. S19** Frequency ( $\nu$ ) dependence of (a) the real ( $\chi_M'$ ) and (b) imaginary ( $\chi_M''$ ) parts of the ac susceptibilities of **1** measured between 4 and 16 K in an  $H_{dc}$  of zero. (c) Argand plot of **1**. The solid lines are guides only.

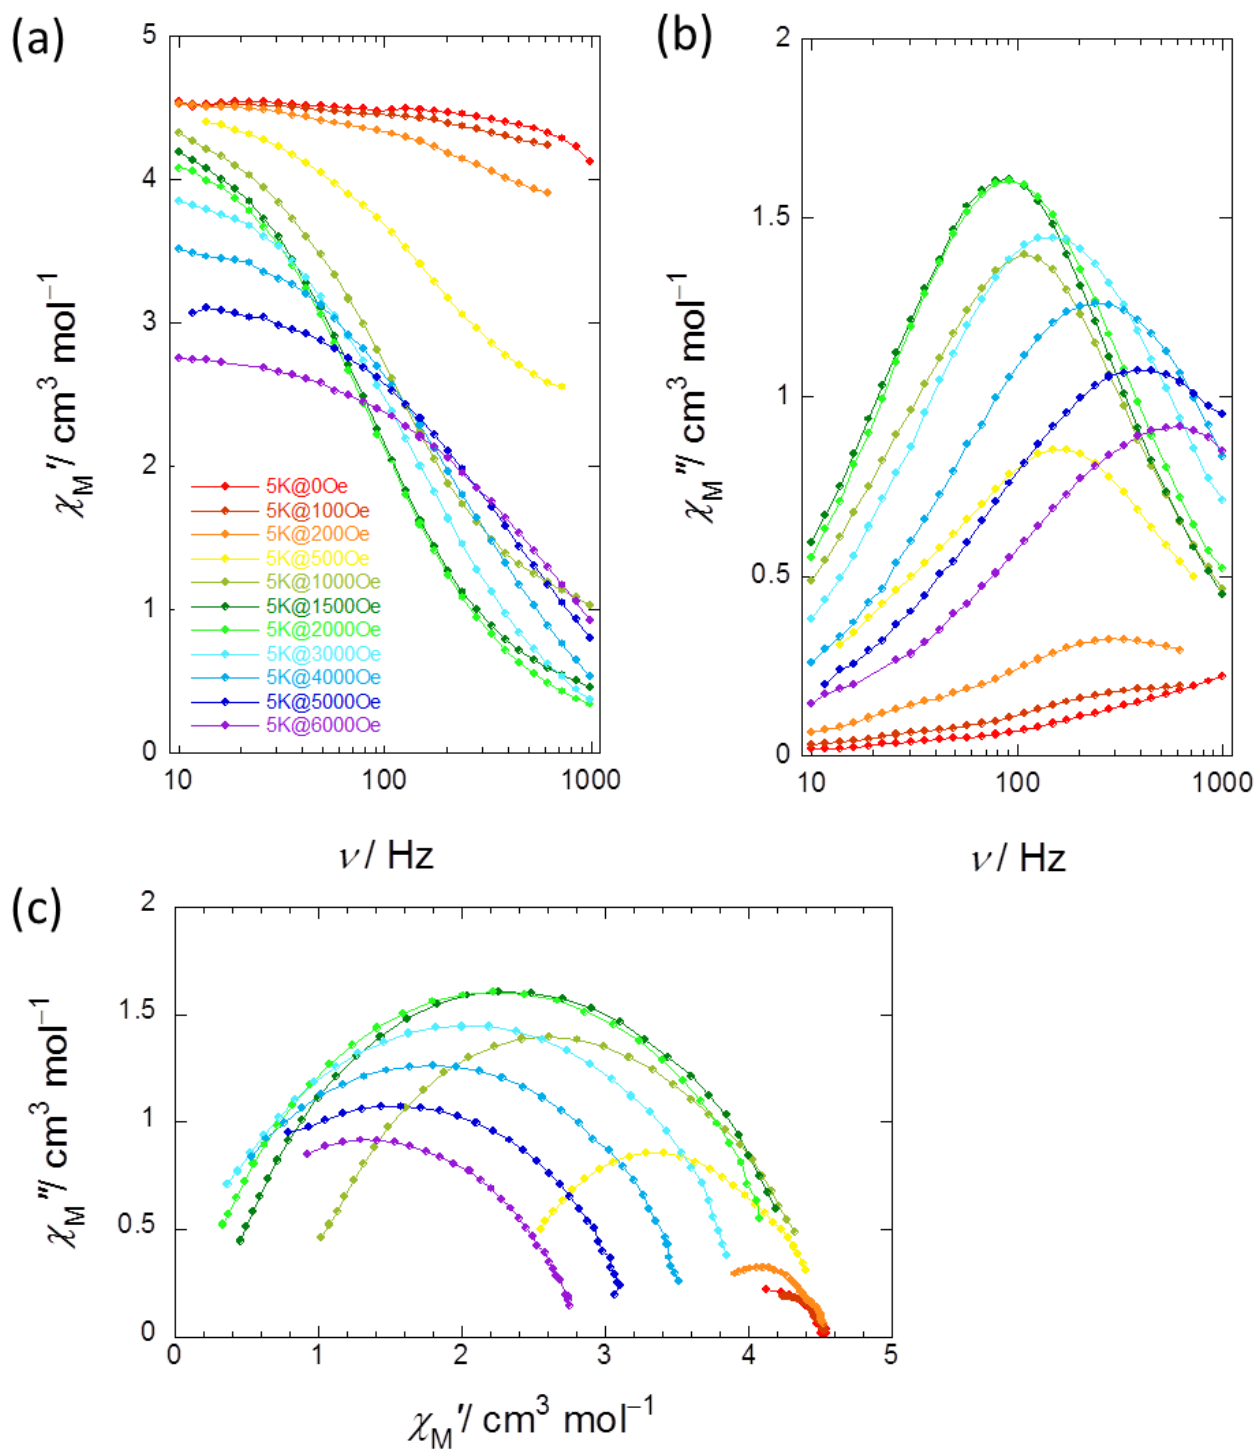

**Fig. S20** Frequency ( $\nu$ ) dependence of (a) the real ( $\chi_M'$ ) and (b) imaginary ( $\chi_M''$ ) parts of the ac susceptibilities of **1** measured between 0 and 6000 Oe at 5 K. (c) Argand plot of **1** measured between 0 and 6000 Oe at 5 K. The solid lines are guides only.

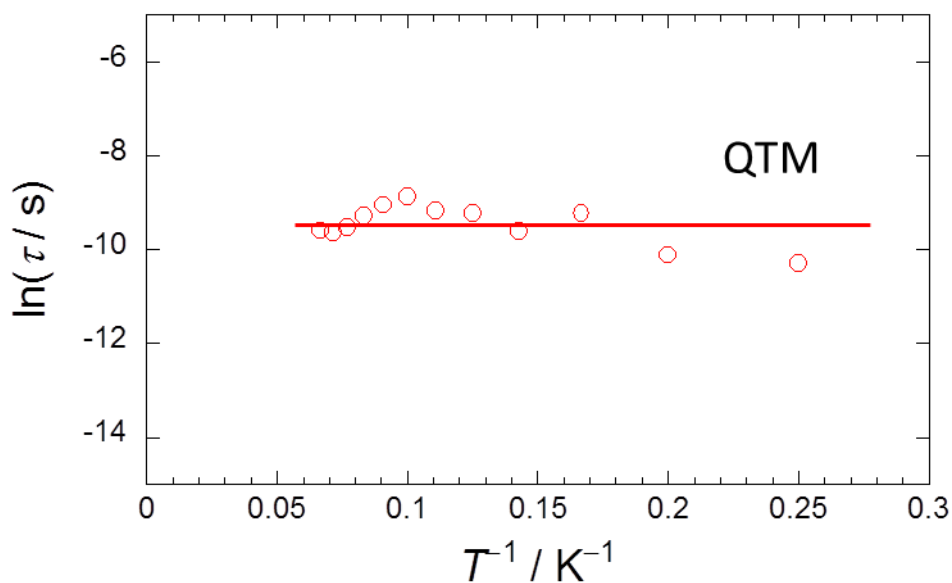

**Fig. S21** Arrhenius plots for **1** in a zero  $H_{dc}$ . Estimates of  $\tau$  from Fig. S20b (see main text). The solid line is guide only.

**Table S4.**  $\tau$  values at 5 K for **1–3** in several  $H_{dc}$

| Complexes                             | $\tau$ /s at 5 K                  | $H_{dc}$ / Oe |
|---------------------------------------|-----------------------------------|---------------|
| [(TTP)Tb(Pc)Tb(TTP)] ( <b>1</b> )     | $4.1 \times 10^{-5}$              | 0             |
|                                       | $2.0 \times 10^{-3}$              | 1500          |
| [(Pc)Tb(Pc)Tb(TTP)] ( <b>2</b> )      | $5.6 \times 10^{-4}$              | 0             |
|                                       | $5.2 \times 10^{-4}$ ( $\tau_1$ ) | 1000          |
|                                       | $1.2 \times 10^{-2}$ ( $\tau_2$ ) | 1000          |
|                                       | $4.0 \times 10^{-4}$ ( $\tau_1$ ) | 3000          |
| [(obPc)Tb(obPc)Tb(obPc)] ( <b>3</b> ) | $2.4 \times 10^{-3}$ ( $\tau_2$ ) | 3000          |
|                                       | $1.8 \times 10^{-2}$              | 0             |
|                                       | $4.8 \times 10^{-3}$ ( $\tau_1$ ) | 3000          |
|                                       | $4.5 \times 10^{-2}$ ( $\tau_2$ ) | 3000          |

The experimental data of **3** from ref. 7e (see main text).

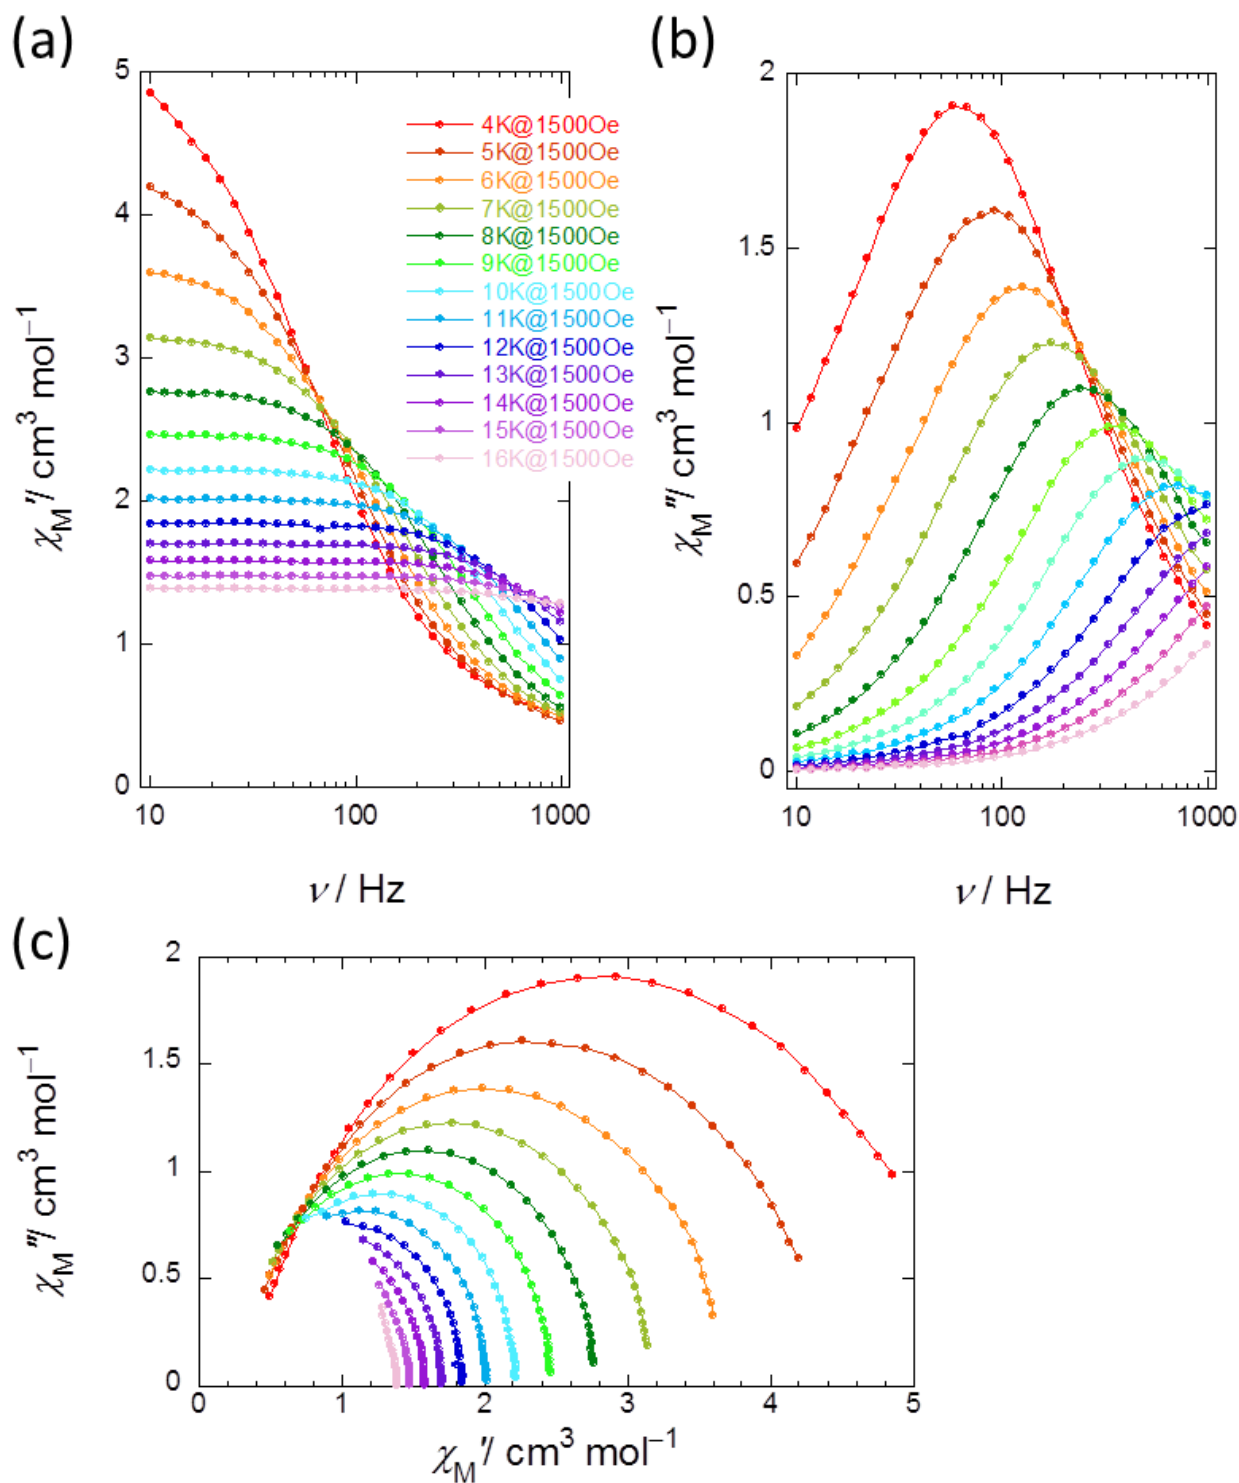

**Fig. S22** Frequency ( $\nu$ ) dependence of (a) the real ( $\chi_M'$ ) and (b) imaginary ( $\chi_M''$ ) parts of the ac susceptibilities of **1** measured between 4 and 16 K in an  $H_{dc}$  of 1500 Oe. (c) Argand plot for **1**. The solid lines are guides only.

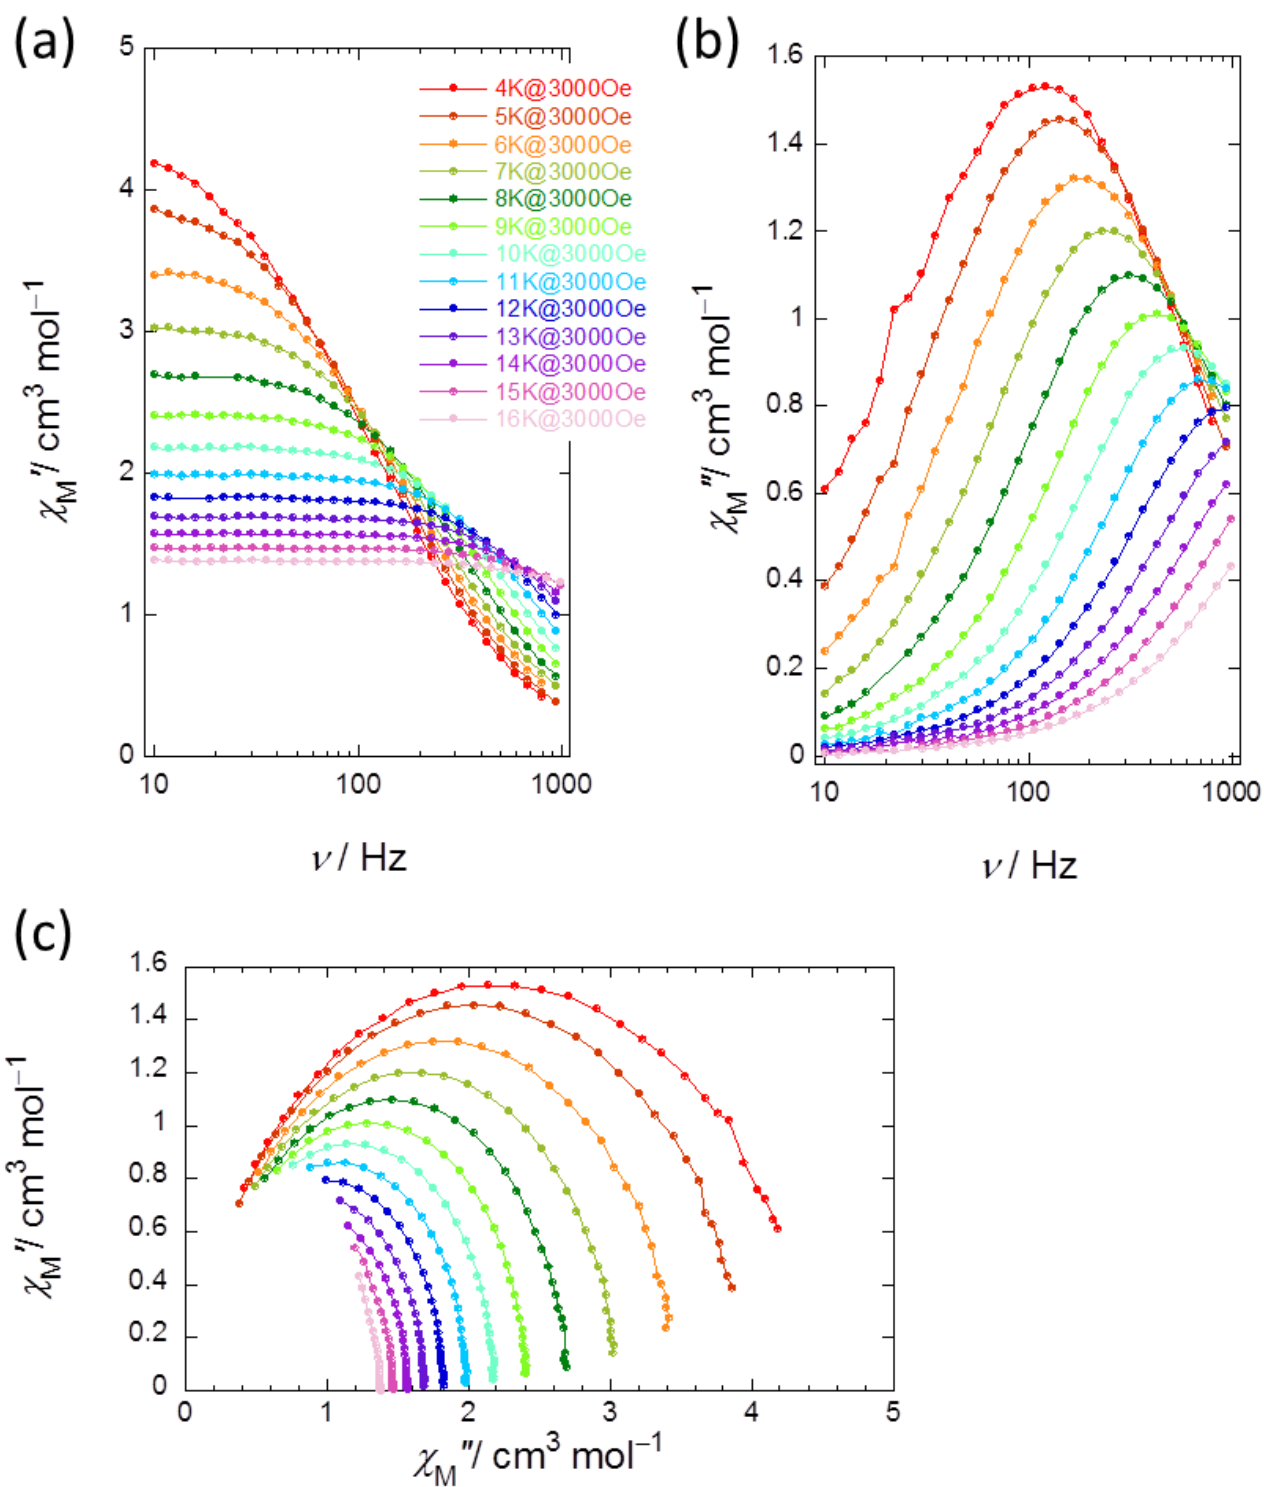

**Fig. S23** Frequency ( $\nu$ ) dependence of (a) the real ( $\chi_M'$ ) and (b) imaginary ( $\chi_M''$ ) parts of the ac susceptibilities of **1** measured between 4 and 16 K in a  $H_{dc}$  of 3000 Oe. (c) Argand plot for **1**. The solid lines are guides only.

## The generalized Debye model (eq. S4)<sup>6</sup>

The real ( $\chi_M'$ ) and imaginary parts ( $\chi_M''$ ) are given by eqs. S5 and S6, respectively.

$$\chi_{total}(\omega) = \chi_S + \frac{\chi_T - \chi_S}{1 + (i\omega\tau)^{1-\alpha}} \quad (\text{eq. S4})$$

$$\chi'(\omega) = \chi_S + (\chi_T - \chi_S) \frac{1 + (\omega\tau)^{1-\alpha} \sin(\pi\alpha/2)}{1 + 2(\omega\tau)^{1-\alpha} \sin(\pi\alpha/2) + (\omega\tau)^{2-2\alpha}} \quad (\text{eq. S5})$$

$$\chi''(\omega) = (\chi_T - \chi_S) \frac{(\omega\tau)^{1-\alpha} \cos(\pi\alpha/2)}{1 + 2(\omega\tau)^{1-\alpha} \sin(\pi\alpha/2) + (\omega\tau)^{2-2\alpha}} \quad (\text{eq. S6})$$

## The Arrhenius equation

From the  $\nu$  dependence of  $T_B$  at each  $T$ , it is possible to estimate  $\Delta$  and  $\tau_0$ , which is the average  $\tau$  in response to thermal fluctuation, from the generalized Debye model by using the Arrhenius equation (eq. S7). This linear relation between  $\ln(\tau)$  and  $T^{-1}$  indicates that the Orbach process (spin-phonon interactions), which approximately correspond to the  $\Delta$  for thermal relaxation of the reversal of the magnetic moment, is dominant in high- $T$  ranges (see main text).

$$\tau = \tau_0 \exp(\Delta E/k_B T) \quad (\text{eq. S7-1})$$

$$\ln(\tau) = \ln(\tau_0) + \Delta E/k_B T \quad (\text{eq. S7-2})$$



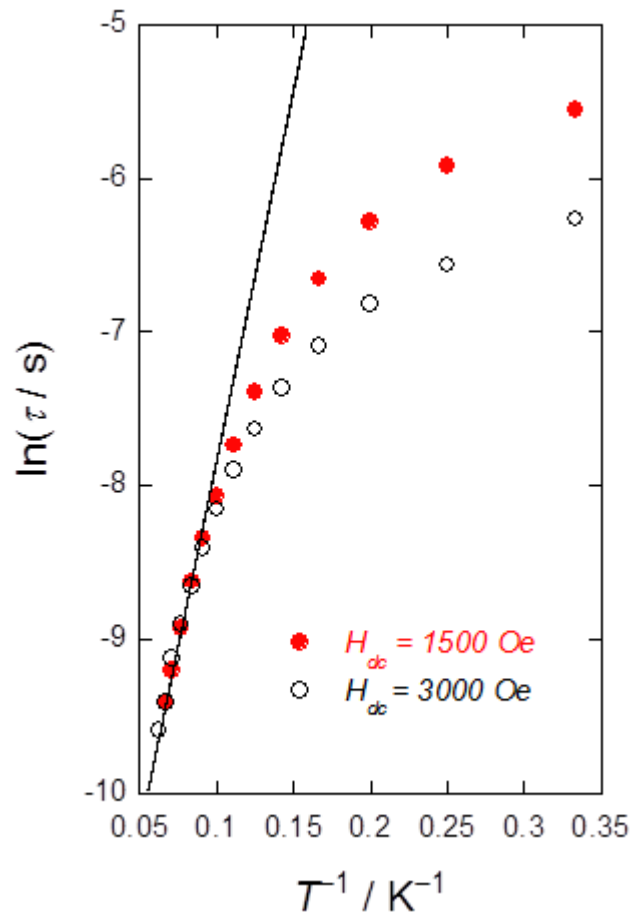

**Fig. S24** An Arrhenius plot of **1**, where the  $\tau$  were obtained from  $\chi_M''$  versus  $\nu$  plots at  $T$  between 4 and 16 K in an  $H_{dc}$  of 1500 (Fig. S22b) and 3000 Oe (Fig. S23b). The solid lines were fitted using an Arrhenius law. The fitting parameters are listed in the main text.

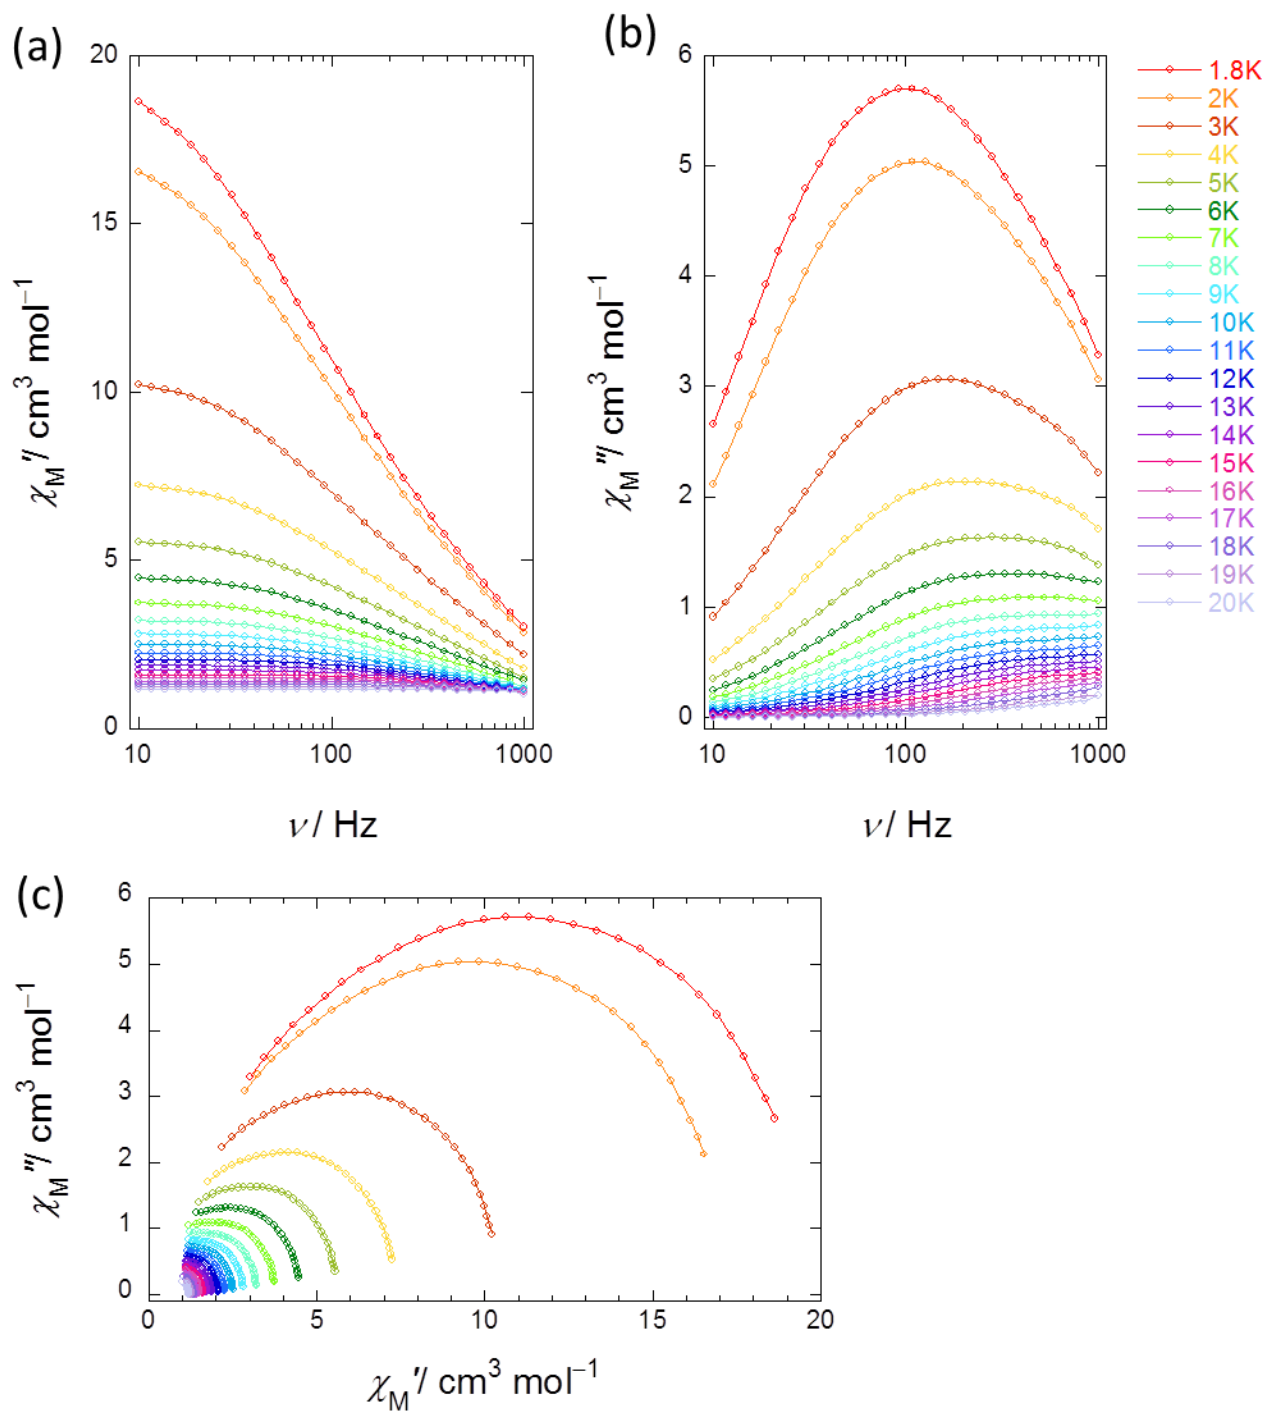

**Fig. S25** Frequency ( $\nu$ ) dependence of (a) the real ( $\chi_M'$ ) and (b) imaginary ( $\chi_M''$ ) parts of the ac susceptibilities of **2** measured between 1.8 and 20 K in an  $H_{\text{dc}}$  of zero. (c) Argand plot for **2**. The solid lines are guides only.

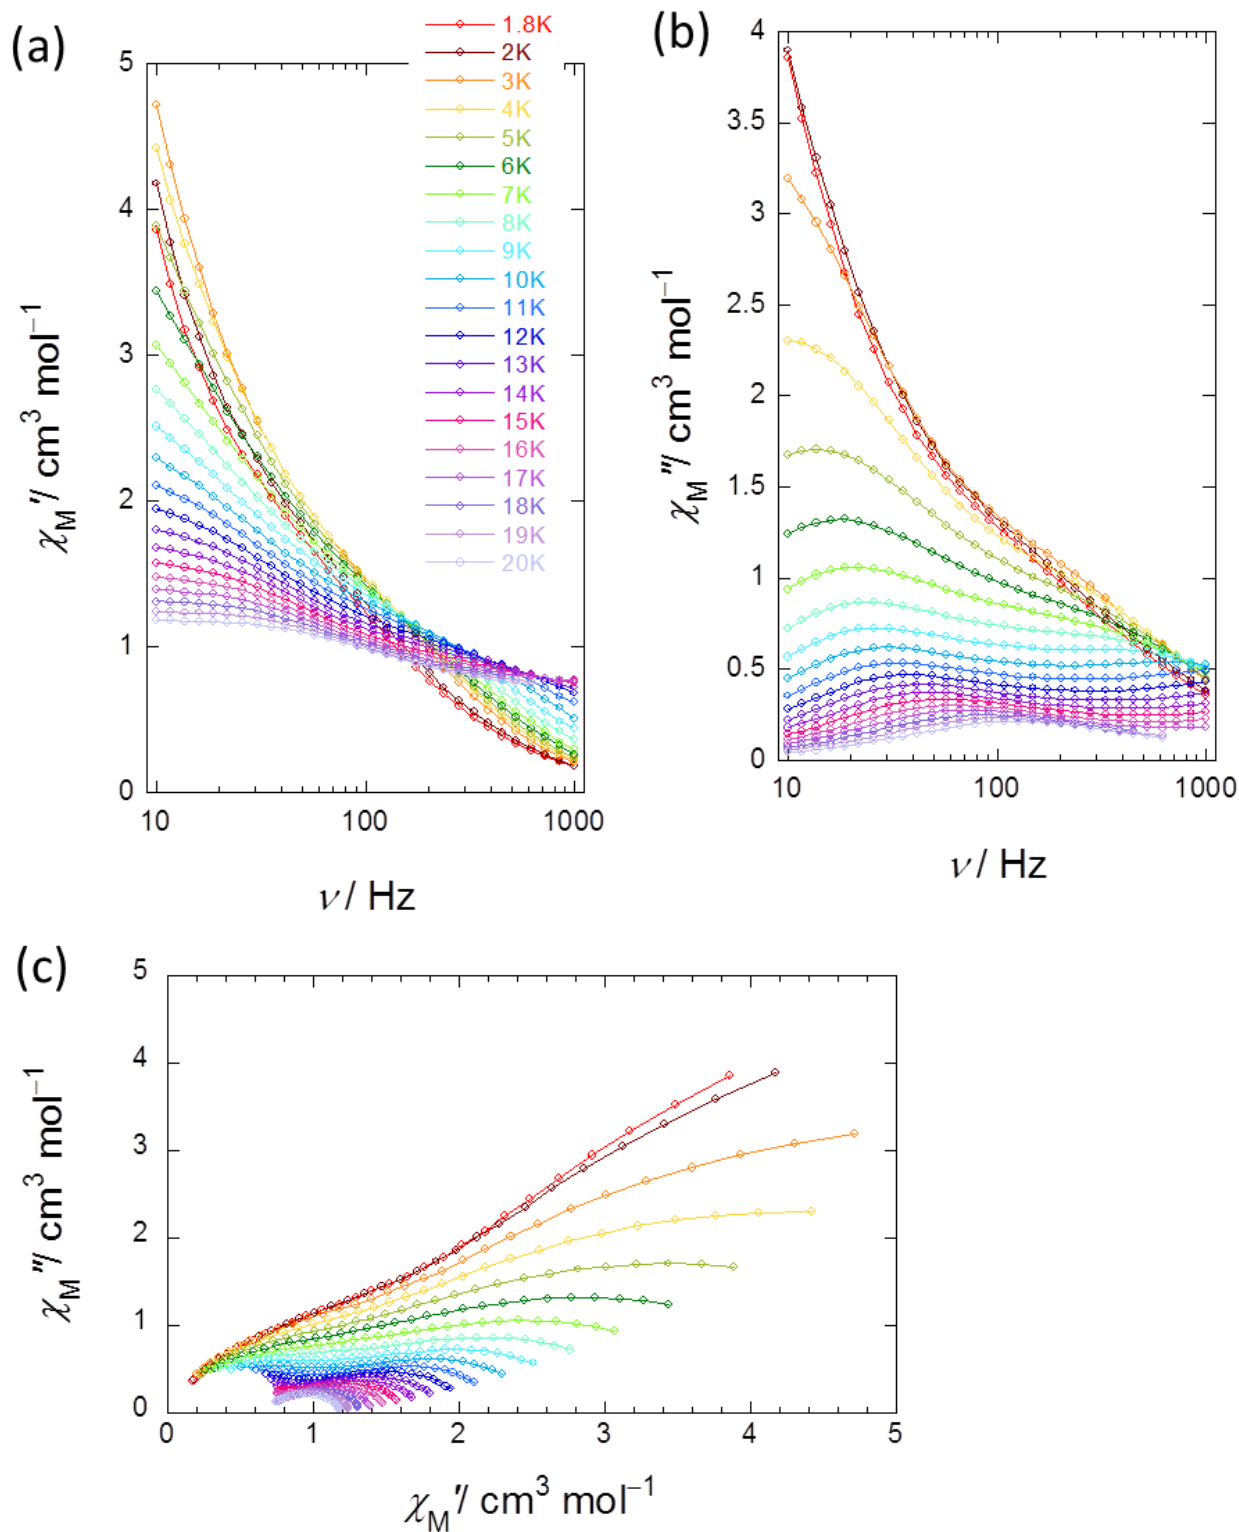

**Fig. S26** Frequency ( $\nu$ ) dependence of (a) the real ( $\chi_M'$ ) and (b) imaginary ( $\chi_M''$ ) parts of the ac susceptibilities of **2** measured between 1.8 and 20 K in an  $H_{\text{dc}}$  of 1000 Oe. (c) Argand plot for **2**. The solid lines are guides only.

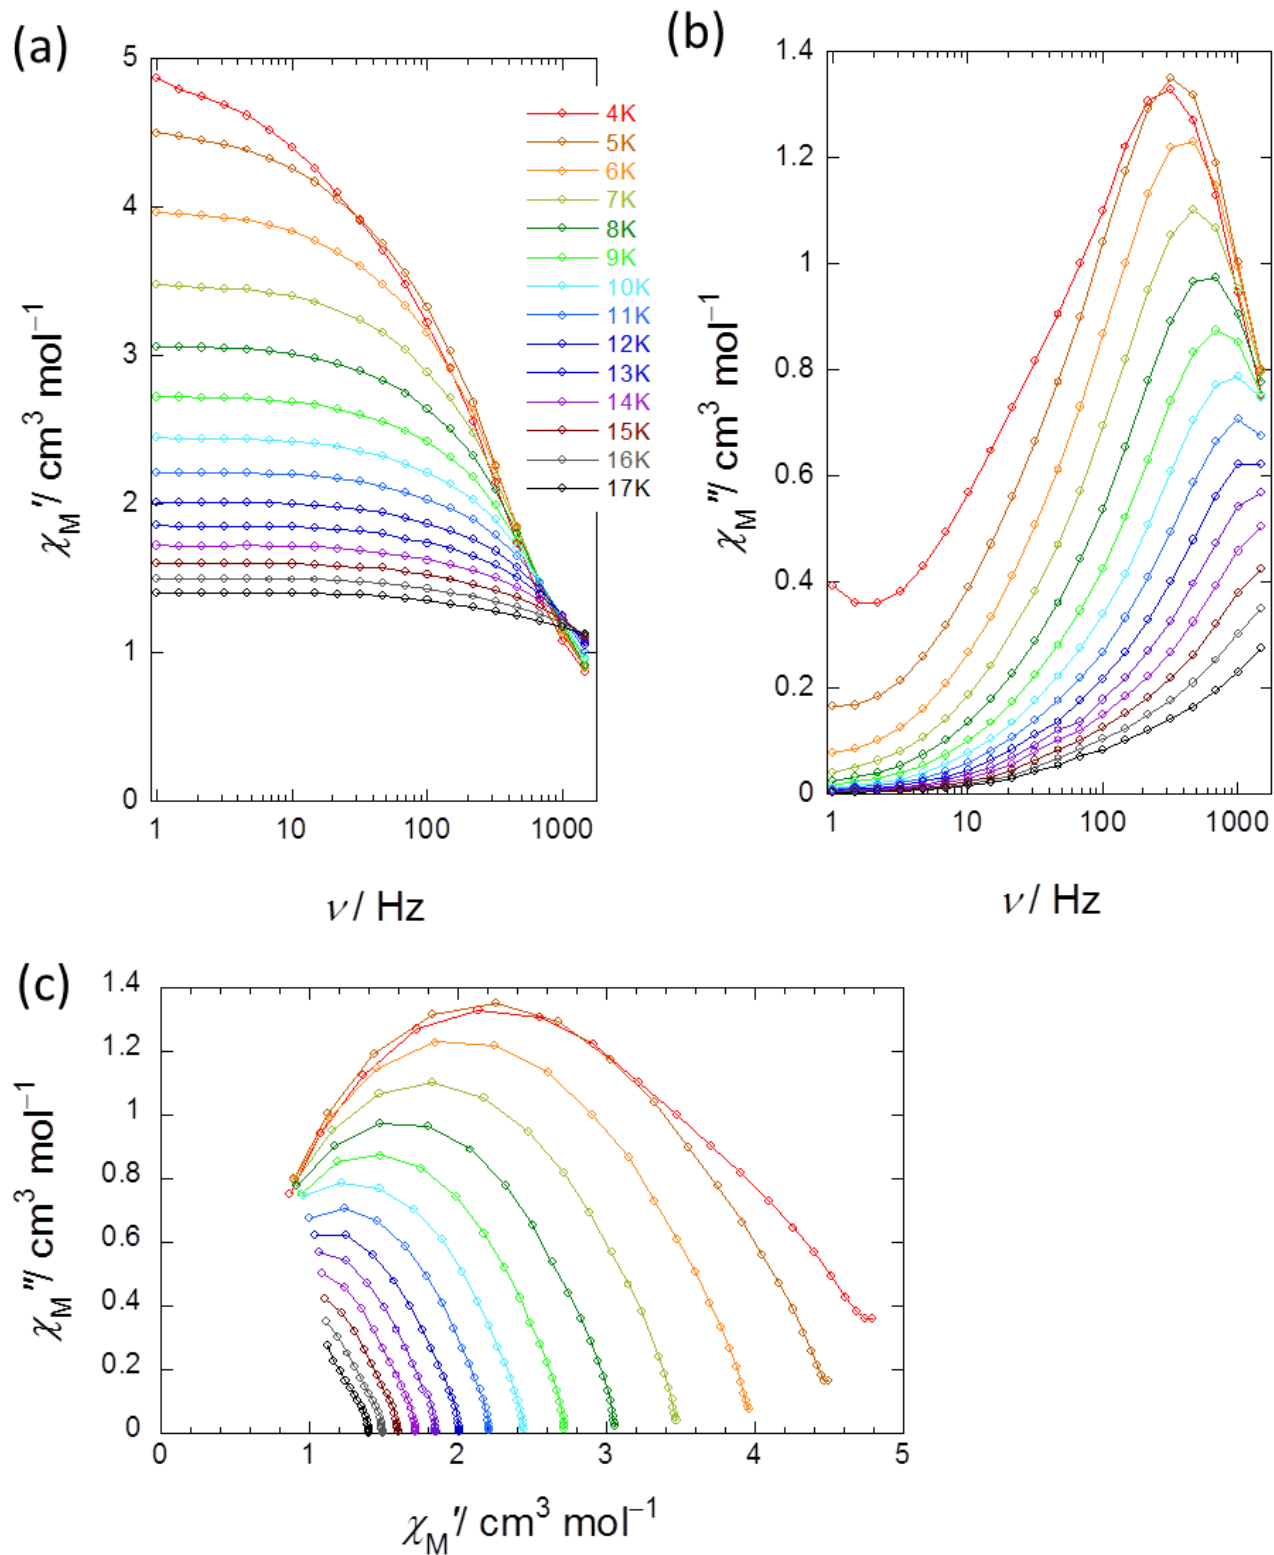

**Fig. S27** Frequency ( $\nu$ ) dependence of (a) the real ( $\chi_M'$ ) and (b) imaginary ( $\chi_M''$ ) parts of the ac susceptibilities of **2** measured between 1.8 and 20 K in a  $H_{dc}$  of 3000 Oe. (c) Argand plot for **2**. The solid lines are guides only.

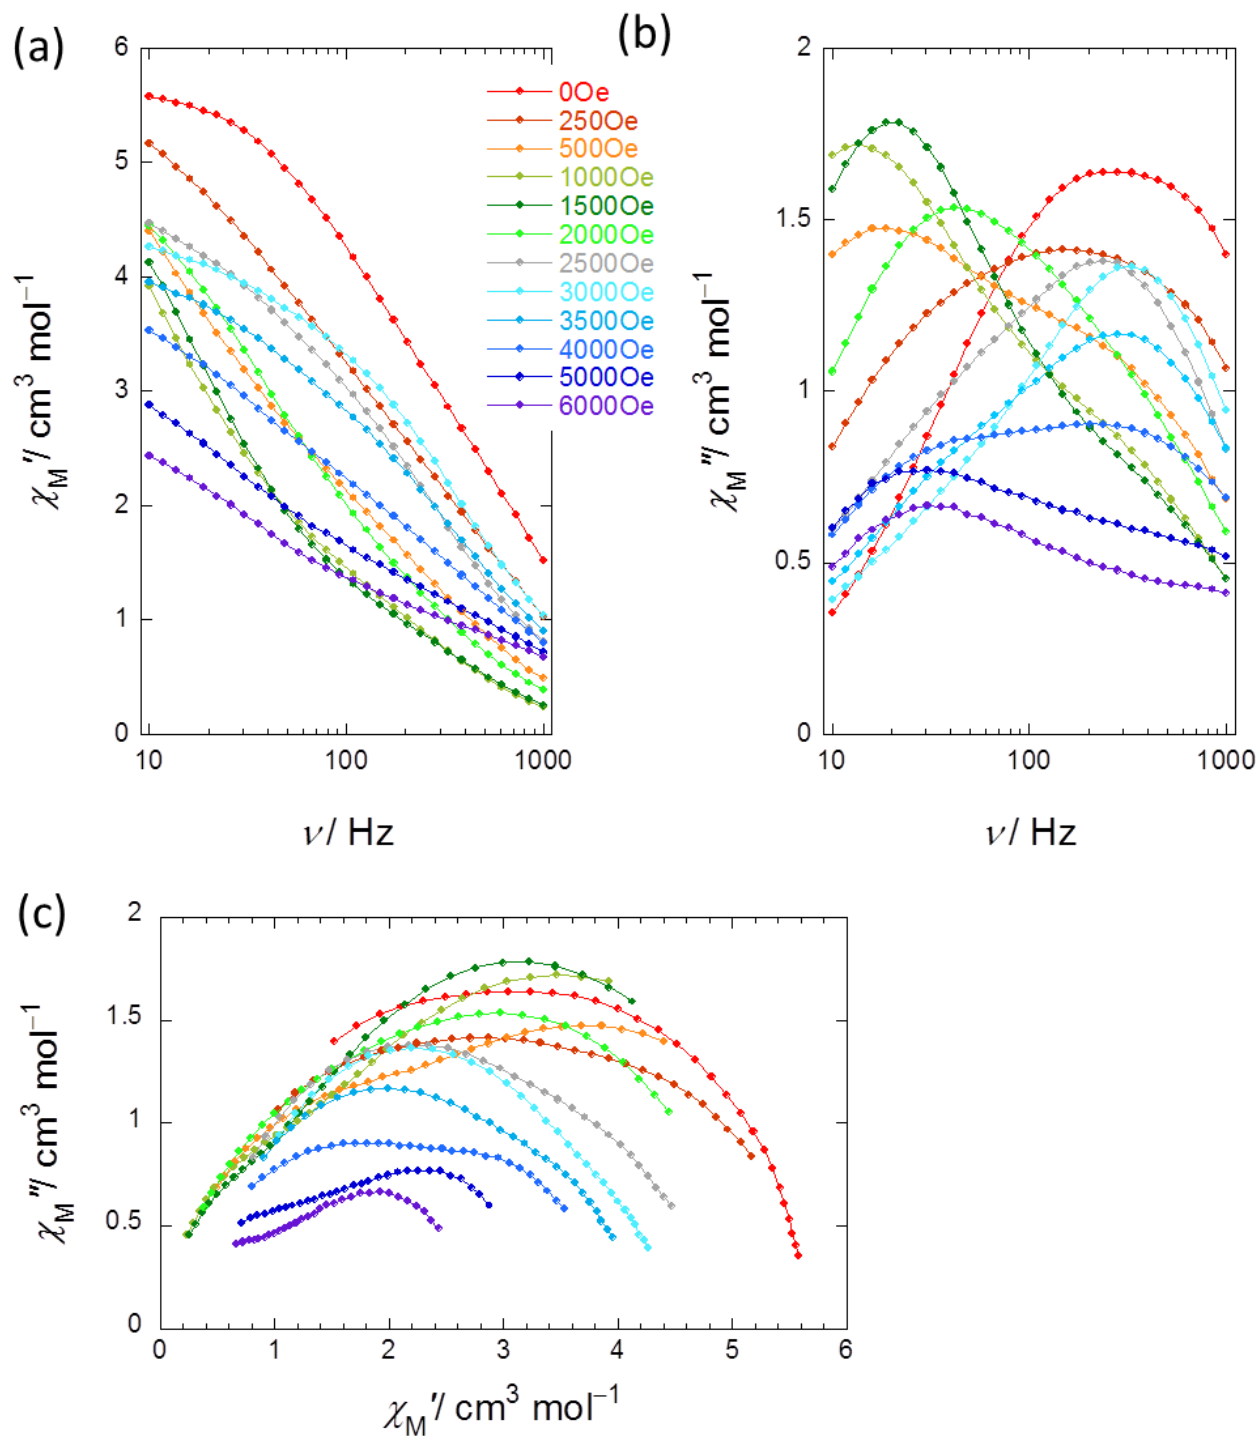

**Fig. S28** Frequency ( $\nu$ ) dependence of (a) the real ( $\chi_M'$ ) and (b) imaginary ( $\chi_M''$ ) parts of the ac susceptibilities of **2** measured between 0 and 6000 Oe at 5 K. Argand plot for **2** measured between 0 and 6000 Oe at 5 K. The solid lines are guides only.

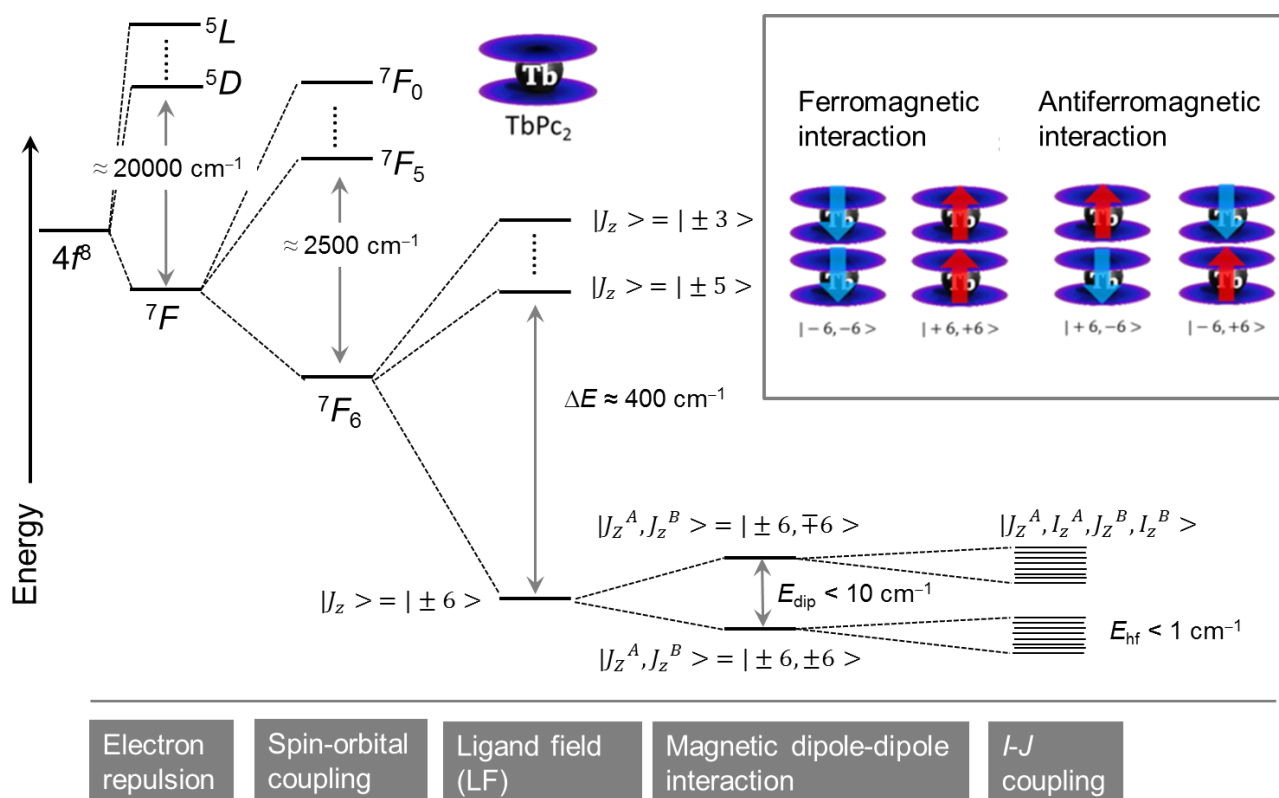

**Fig. S29** Schematic representation of electronic structure of  $Tb^{III}$  ion ( $4f^8$ ) and  $TbPC_2$  complexes. Magnetic dipole-dipole interactions are important for  $Tb^{III}$  dinuclear complexes.

**The extended Debye model (eq. S8)<sup>7</sup>**

$$\chi_{total}(\omega) = \chi_s + (\chi_T - \chi_s) \left[ \frac{\beta}{1 + (i\omega\tau_1)^{1-\alpha_1}} + \frac{1-\beta}{1 + (i\omega\tau_2)^{1-\alpha_2}} \right] \quad (\text{eq. S8})$$

$$\chi' = \chi_s + (\chi_T - \chi_s) \left\{ \frac{\beta [1 + (\omega\tau_1)^{1-\alpha_1} \sin \frac{1}{2} \alpha_1 \pi]}{1 + 2(\omega\tau_1)^{1-\alpha_1} \sin \frac{1}{2} \alpha_1 \pi + (\omega\tau_1)^{2(1-\alpha_1)}} + \frac{(1-\beta) [1 + (\omega\tau_2)^{1-\alpha_2} \sin \frac{1}{2} \alpha_2 \pi]}{1 + 2(\omega\tau_2)^{1-\alpha_2} \sin \frac{1}{2} \alpha_2 \pi + (\omega\tau_2)^{2(1-\alpha_2)}} \right\} \quad (\text{eq. S9})$$

$$\chi'' = (\chi_T - \chi_s) \left\{ \frac{\beta (\omega\tau_1)^{1-\alpha_1} \cos \frac{1}{2} \alpha_1 \pi}{1 + 2(\omega\tau_1)^{1-\alpha_1} \sin \frac{1}{2} \alpha_1 \pi + (\omega\tau_1)^{2(1-\alpha_1)}} + \frac{(1-\beta) (\omega\tau_2)^{1-\alpha_2} \cos \frac{1}{2} \alpha_2 \pi}{1 + 2(\omega\tau_2)^{1-\alpha_2} \sin \frac{1}{2} \alpha_2 \pi + (\omega\tau_2)^{2(1-\alpha_2)}} \right\} \quad (\text{eq. S10})$$

where  $\chi_s$  is the adiabatic susceptibility,  $\chi_T$  is the isothermal susceptibility,<sup>40,50</sup>  $\omega (= 2\pi\nu)$  is the angular frequency,  $\tau_1$  and  $\tau_2$  are the magnetization relaxation times,  $\tau_1$  and  $\tau_2$  describe the distributions of the relaxation processes,  $\beta$  is the weight of the first relaxation process, and  $(1-\beta)$  corresponds to the second one. The real part and the imaginary part are given by equations (eq. S9) and (eq. S10), respectively.

**Table S5.** Selected geometry and SMM parameters for **1–3** and a related SMM

| Complexes                                     | $\phi_A/^\circ$ | $\phi_B/^\circ$ | Site geometry | $\Delta/\text{cm}^{-1}$ | $\tau_0/\text{s}$     | $H_{\text{dc}}/\text{Oe}$ |
|-----------------------------------------------|-----------------|-----------------|---------------|-------------------------|-----------------------|---------------------------|
| [(TTP)Tb(Pc)Tb(TTP)] ( <b>1</b> )             | 4               | 4               | SP-SP         | 18–24                   | $10^{-6}$ – $10^{-7}$ | 0                         |
|                                               | –               | –               | –             | 32                      | $3.97 \times 10^{-6}$ | 1500                      |
| [(Pc)Tb(Pc)Tb(TTP)] ( <b>2</b> )              | 14              | 38              | SAP-SAP*      | 15                      | $4.77 \times 10^{-5}$ | 0                         |
| SAP (site A)                                  | 14              | –               | –             | 60                      | $3.48 \times 10^{-6}$ | 1000                      |
| SAP* (site B)                                 | –               | 38              | –             | 162                     | $3.16 \times 10^{-8}$ | 1000                      |
|                                               | 14              | 38              | –             | 43                      | $5.02 \times 10^{-7}$ | 3000                      |
| [(obPc)Tb(obPc)Tb(obPc)] ( <b>3</b> )         | 32              | 32              | SAP-SAP       | 206                     | $3.8 \times 10^{-10}$ | 0                         |
| {[Tb(TTP) <sub>2</sub> ](H-DBU)} <sup>8</sup> | 45              | –               | SAP           | 269                     | $1.6 \times 10^{-11}$ | 0                         |
|                                               | –               | –               | –             | 283                     | $6.8 \times 10^{-12}$ | 2000                      |
| [(Pc)Tb(Pc)Tb(T(pOMe)PP)] <sup>9</sup>        | 1               | 45              | SP-SAP*       | None                    | None                  |                           |

The experimental data of **3** from ref. 7e (see main text).



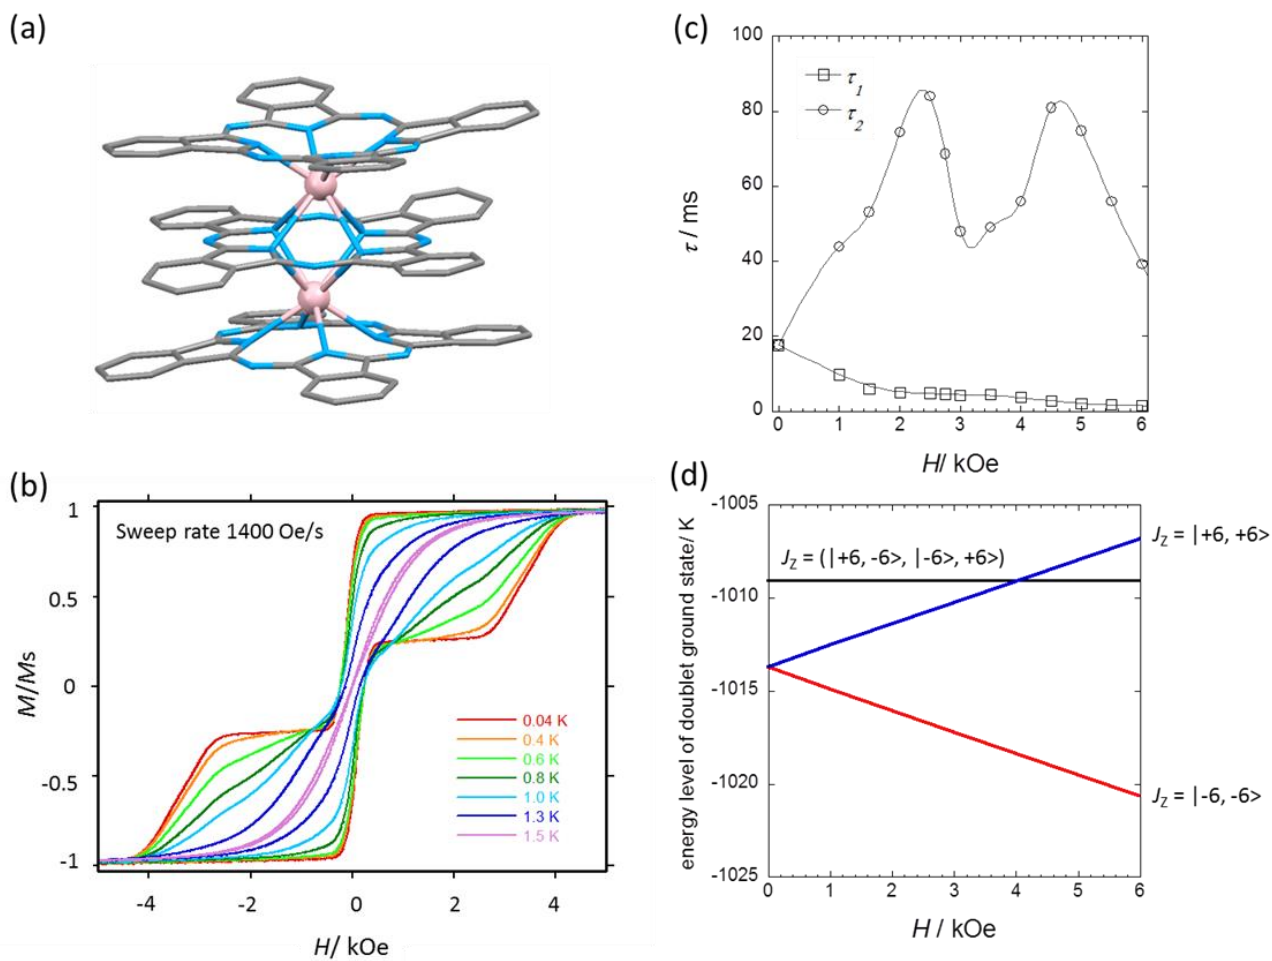

**Fig. S30**<sup>10</sup> (a) Crystal structure of  $\text{Tb}_2(\text{obPc})_3$ . The *n*-butoxy chains have been omitted for clarity. (b) Hysteresis loops for a single crystal of  $\text{Tb}_2(\text{obPc})_3$ . (c) Relaxation time ( $\tau$ ) versus magnetic field plot for  $\text{Tb}_2(\text{obPc})_3$  made by using parameters obtained from Argand plots. (d) Zeeman diagram of the doublet ground state for  $\text{Tb}_2(\text{obPc})_3$  which was obtained from magnetic heat capacity ( $C_m$ ) in an  $H_{dc}$ .

## References

1. J. Jiang, D. P. Arnold and H. Yu, *Polyhedron*, 1999, **18**, 2129 and references therein.
2. F. Luis, J. Bartolomé, J. F. Fernández, J. Tejada, J. M. Hernández, X. X. Zhang and R. Ziolo, *Phys. Rev. B*, 1997, **55**, 11448.
3. J. Bartolomé, G. Filoti, V. Kuncser, G. Schinteie, V. Mereacre, C. E. Anson, A. K. Powell, D. Prodius and C. Turta, *Phys. Rev. B*, 2009, **80**, 014430.
4. J. Ferrando-Soria, D. Cangussu, M. Eslava, Y. Journaux, R. Lescouëzec, M. Julve, F. Lloret, J. Pasán, C. Ruiz-Pérez, E. Lhotel, C. Paulsen and E. Pardo, *Chem. Eur. J.*, 2011, **17**, 12482.
5. I. A. Gass, B. Moubaraki, S. K. Langley, S. R. Batten and K. S. Murray, *Chem. Commun.*, 2012, **48**, 2089.
6. K. S. Cole and R. H. Cole, *J. Chem. Phys.*, 1941, **9**, 341.
7. N. Domingo, F. Luis, M. Nakano, M. Muntó, J. Gómez, J. Chaboy and N. Ventosa, *Phys. Rev. B*, 2009, **79**, 214404-1.
8. D. Tanaka, T. Inose, H. Tanaka, S. Lee, N. Ishikawa and T. Ogawa, *Chem. Commun.*, 2012, **48**, 7796.
9. S. Sakaue, A. Fuyuhiko, T. Fukuda and N. Ishikawa, *Chem. Commun.*, 2012, **48**, 5337.
10. K. Katoh, T. Kajiwara, M. Nakano, Y. Nakazawa, W. Wernsdorfer, N. Ishikawa, B. K. Breedlove and M. Yamashita, *Chem. Eur. J.*, 2011, **17**, 117.
